# Supplementary material
Source: publisher figshare collection journal article supplement (https://sage.figshare.com/ndownloader/files/18725231)
Supplement: Supplementary file 1 [file 18725231]

## Sheet: repair_genes_with_subcellular_i
ID	Symbol	Entrez Gene Name	log2FoldChange	padj	Location	Type	number_GO
ENSMUSG00000034974	Dapk3	death associated protein kinase 3	4.06687	7.82876e-48	Cytoplasm	kinase	12
ENSMUSG00000000149	Gna12	G protein subunit alpha 12	3.06979	0.000609266	Plasma Membrane	enzyme	2
ENSMUSG00000000184	Ccnd2	cyclin D2	1.55792	5.86038e-07	Nucleus	other	1
ENSMUSG00000000303	Cdh1	cadherin 1	3.37877	1.15509e-08	Plasma Membrane	other	17
ENSMUSG00000000320	Alox12	arachidonate 12-lipoxygenase, 12S type	-11.3044	9.8825e-19	Cytoplasm	enzyme	14
ENSMUSG00000024789	Jak2	Janus kinase 2	2.29165	1.98527e-15	Cytoplasm	kinase	27
ENSMUSG00000026826	Nr4a2	nuclear receptor subfamily 4 group A member 2	5.74232	2.77261e-09	Nucleus	ligand-dependent nuclear receptor	10
ENSMUSG00000000486	Sept1	septin 1	1.11171	0.0227258	Cytoplasm	enzyme	1
ENSMUSG00000020053	Igf1	insulin like growth factor 1	5.25366	2.44881e-26	Extracellular Space	growth factor	33
ENSMUSG00000000531	Grasp	general receptor for phosphoinositides 1 associated scaffold protein	6.155	5.25758e-09	Plasma Membrane	other	4
ENSMUSG00000000532	Acvr1b	activin A receptor type 1B	-1.66204	0.00927676	Plasma Membrane	kinase	4
ENSMUSG00000038418	Egr1	early growth response 1	4.77651	4.28996e-73	Nucleus	transcription regulator	18
ENSMUSG00000025854	Fam20c	FAM20C, golgi associated secretory pathway kinase	1.85811	8.85078e-11	Extracellular Space	enzyme	3
ENSMUSG00000000732	Icosl	inducible T cell costimulator ligand	1.2355	0.0020695	Plasma Membrane	other	4
ENSMUSG00000000753	Serpinf1	serpin family F member 1	2.97905	1.20775e-08	Extracellular Space	other	13
ENSMUSG00000056501	Cebpb	CCAAT enhancer binding protein beta	5.06689	4.55503e-58	Nucleus	transcription regulator	11
ENSMUSG00000027660	Skil	SKI like proto-oncogene	3.34581	1.79911e-41	Nucleus	transcription regulator	13
ENSMUSG00000051439	Cd14	CD14 molecule	3.95571	3.17082e-44	Plasma Membrane	transmembrane receptor	4
ENSMUSG00000029304	Spp1	secreted phosphoprotein 1	10.8339	1.92009e-183	Extracellular Space	cytokine	5
ENSMUSG00000013089	Etv5	ETS variant 5	4.01481	3.40648e-33	Nucleus	transcription regulator	5
ENSMUSG00000000881	Dlg3	discs large MAGUK scaffold protein 3	1.79652	0.0174254	Plasma Membrane	kinase	9
ENSMUSG00000000957	Mmp14	matrix metallopeptidase 14	6.38418	4.28996e-73	Extracellular Space	peptidase	15
ENSMUSG00000000915	Hip1r	huntingtin interacting protein 1 related	1.76279	0.000197688	Cytoplasm	other	10
ENSMUSG00000029096	Htra3	HtrA serine peptidase 3	6.91971	8.61935e-24	Extracellular Space	peptidase	8
ENSMUSG00000058755	Osm	oncostatin M	6.05954	4.88983e-147	Extracellular Space	cytokine	6
ENSMUSG00000001025	S100a6	S100 calcium binding protein A6	-1.38124	3.31259e-11	Cytoplasm	transporter	2
ENSMUSG00000001029	Icam2	intercellular adhesion molecule 2	-1.021	7.87553e-05	Plasma Membrane	other	1
ENSMUSG00000001036	Epn2	epsin 2	3.2337	0.0400795	Cytoplasm	other	7
ENSMUSG00000018920	Cxcl16	C-X-C motif chemokine ligand 16	5.23773	1.49634e-124	Extracellular Space	cytokine	2
ENSMUSG00000052837	Junb	JunB proto-oncogene, AP-1 transcription factor subunit	2.16934	3.95123e-28	Nucleus	transcription regulator	2
ENSMUSG00000037992	Rara	retinoic acid receptor alpha	-1.39052	2.07824e-06	Nucleus	ligand-dependent nuclear receptor	7
ENSMUSG00000022346	Myc	MYC proto-oncogene, bHLH transcription factor	2.92512	1.83896e-26	Nucleus	transcription regulator	10
ENSMUSG00000001313	Rnd2	Rho family GTPase 2	3.27055	0.014148	Cytoplasm	enzyme	11
ENSMUSG00000001348	Acp5	acid phosphatase 5, tartrate resistant	1.90904	8.58265e-08	Cytoplasm	phosphatase	4
ENSMUSG00000070348	Ccnd1	cyclin D1	4.57739	2.10544e-26	Nucleus	transcription regulator	7
ENSMUSG00000001435	Col18a1	collagen type XVIII alpha 1 chain	5.79527	0.0405094	Extracellular Space	other	10
ENSMUSG00000030103	Bhlhe40	basic helix-loop-helix family member e40	3.51823	2.74484e-25	Nucleus	transcription regulator	1
ENSMUSG00000001525	Tubb5	tubulin beta class I	1.63198	8.4476e-10	Cytoplasm	other	3
ENSMUSG00000001552	Jup	junction plakoglobin	1.46061	1.97675e-06	Plasma Membrane	other	14
ENSMUSG00000001627	Ifrd1	interferon related developmental regulator 1	3.68582	0.000136858	Nucleus	other	7
ENSMUSG00000019970	Sgk1	serum/glucocorticoid regulated kinase 1	1.94091	1.09107e-14	Cytoplasm	kinase	8
ENSMUSG00000035373	Ccl7	chemokine (C-C motif) ligand 7	10.6543	1.92468e-47	Extracellular Space	cytokine	2
ENSMUSG00000001827	Folr1	folate receptor 1	7.48296	4.41891e-05	Plasma Membrane	transporter	17
ENSMUSG00000001847	Rac1	Rac family small GTPase 1	2.20684	1.40364e-14	Plasma Membrane	enzyme	36
ENSMUSG00000001930	Vwf	von Willebrand factor	-3.38061	4.77823e-27	Extracellular Space	other	4
ENSMUSG00000001946	Esam	endothelial cell adhesion molecule	-2.82933	6.21629e-06	Plasma Membrane	other	5
ENSMUSG00000001986	Gria3	glutamate ionotropic receptor AMPA type subunit 3	3.05653	8.28359e-06	Plasma Membrane	ion channel	6
ENSMUSG00000042265	Trem1	triggering receptor expressed on myeloid cells 1	4.03163	2.67652e-27	Plasma Membrane	transmembrane receptor	1
ENSMUSG00000002055	Spag5	sperm associated antigen 5	4.71048	2.97932e-05	Nucleus	peptidase	1
ENSMUSG00000002059	Rab34	RAB34, member RAS oncogene family	6.27039	4.99227e-06	Cytoplasm	enzyme	1
ENSMUSG00000053580	Tanc2	tetratricopeptide repeat, ankyrin repeat and coiled-coil containing 2	6.63322	7.84382e-22	Nucleus	transcription regulator	4
ENSMUSG00000002104	Rapsn	receptor associated protein of the synapse	5.19105	3.82467e-08	Plasma Membrane	other	8
ENSMUSG00000000440	Pparg	peroxisome proliferator activated receptor gamma	1.35405	3.73703e-06	Nucleus	ligand-dependent nuclear receptor	15
ENSMUSG00000002221	Paxip1	PAX interacting (with transcription-activation domain) protein 1	1.69426	2.11824e-06	Nucleus	other	2
ENSMUSG00000002233	Rhoc	ras homolog family member C	2.55609	2.54622e-05	Plasma Membrane	enzyme	7
ENSMUSG00000002289	Angptl4	angiopoietin like 4	3.1385	1.03417e-08	Extracellular Space	other	2
ENSMUSG00000002489	Tiam1	T cell lymphoma invasion and metastasis 1	-1.21018	2.18776e-05	Cytoplasm	other	35
ENSMUSG00000002602	Axl	AXL receptor tyrosine kinase	2.11513	1.36047e-24	Plasma Membrane	kinase	12
ENSMUSG00000038508	Gdf15	growth differentiation factor 15	7.2366	1.36047e-24	Extracellular Space	growth factor	2
ENSMUSG00000076431	Sox4	SRY-box 4	5.08486	2.85e-21	Nucleus	transcription regulator	6
ENSMUSG00000015396	Cd83	CD83 molecule	6.45272	9.0632e-26	Plasma Membrane	transmembrane receptor	3
ENSMUSG00000002985	Apoe	apolipoprotein E	1.93737	1.3763e-16	Extracellular Space	transporter	44
ENSMUSG00000024014	Pim1	Pim-1 proto-oncogene, serine/threonine kinase	2.90508	4.77431e-14	Cytoplasm	kinase	1
ENSMUSG00000003233	Dvl3	dishevelled segment polarity protein 3	1.05677	0.0180957	Cytoplasm	other	8
ENSMUSG00000003279	Dlgap1	DLG associated protein 1	5.76884	0.043164	Plasma Membrane	other	4
ENSMUSG00000028284	Map3k7	mitogen-activated protein kinase kinase kinase 7	1.65722	1.41104e-11	Cytoplasm	kinase	7
ENSMUSG00000003352	Cacnb3	calcium voltage-gated channel auxiliary subunit beta 3	8.44888	4.46156e-13	Plasma Membrane	ion channel	1
ENSMUSG00000003518	Dusp3	dual specificity phosphatase 3	1.22146	3.38434e-10	Cytoplasm	phosphatase	9
ENSMUSG00000003534	Ddr1	discoidin domain receptor tyrosine kinase 1	1.37924	0.00984804	Plasma Membrane	kinase	7
ENSMUSG00000003970	Rpl8	ribosomal protein L8	-1.37919	1.35369e-08	Cytoplasm	other	4
ENSMUSG00000027398	Il1b	interleukin 1 beta	3.91851	9.6223e-45	Extracellular Space	cytokine	25
ENSMUSG00000004508	Gab2	GRB2 associated binding protein 2	1.28692	1.09267e-08	Cytoplasm	other	1
ENSMUSG00000004558	Ndrg2	NDRG family member 2	2.69397	0.00777433	Cytoplasm	other	8
ENSMUSG00000004562	Arhgef40	Rho guanine nucleotide exchange factor 40	4.9245	7.8785e-13	Other	other	3
ENSMUSG00000004568	Arhgef18	Rho/Rac guanine nucleotide exchange factor 18	-1.30246	2.63642e-07	Cytoplasm	other	3
ENSMUSG00000005469	Prkaca	protein kinase cAMP-activated catalytic subunit alpha	2.36741	8.20493e-11	Cytoplasm	kinase	10
ENSMUSG00000026981	Il1rn	interleukin 1 receptor antagonist	2.99733	1.54402e-39	Extracellular Space	cytokine	7
ENSMUSG00000005089	Slc1a2	solute carrier family 1 member 2	3.64284	0.0450631	Plasma Membrane	transporter	4
ENSMUSG00000003345	Csnk1g2	casein kinase 1 gamma 2	2.33524	2.14018e-10	Cytoplasm	kinase	5
ENSMUSG00000005125	Ndrg1	N-myc downstream regulated 1	-1.98701	6.68187e-20	Nucleus	kinase	5
ENSMUSG00000005161	Prdx2	peroxiredoxin 2	-1.06708	1.12944e-07	Cytoplasm	enzyme	5
ENSMUSG00000005360	Slc1a3	solute carrier family 1 member 3	9.75552	1.82923e-11	Plasma Membrane	transporter	5
ENSMUSG00000030084	Plxna1	plexin A1	3.75311	8.15593e-20	Plasma Membrane	transmembrane receptor	11
ENSMUSG00000036526	Card11	caspase recruitment domain family member 11	2.96894	4.28879e-10	Cytoplasm	kinase	2
ENSMUSG00000005514	Por	cytochrome p450 oxidoreductase	1.31425	1.94257e-07	Cytoplasm	enzyme	2
ENSMUSG00000005534	Insr	insulin receptor	-1.00913	0.00167412	Plasma Membrane	kinase	9
ENSMUSG00000005575	Ube2m	ubiquitin conjugating enzyme E2 M	1.93775	6.39562e-09	Cytoplasm	enzyme	3
ENSMUSG00000030789	Itgax	integrin subunit alpha X	2.69802	7.51065e-18	Plasma Membrane	transmembrane receptor	2
ENSMUSG00000005800	Mmp8	matrix metallopeptidase 8	-1.80392	1.48251e-20	Extracellular Space	peptidase	10
ENSMUSG00000005958	Ephb3	EPH receptor B3	6.94393	0.000158307	Plasma Membrane	kinase	14
ENSMUSG00000031722	Hp	haptoglobin	-1.71432	1.26668e-17	Extracellular Space	peptidase	1
ENSMUSG00000006219	Fblim1	filamin binding LIM protein 1	9.50246	2.48493e-12	Plasma Membrane	other	3
ENSMUSG00000006301	Tmbim1	transmembrane BAX inhibitor motif containing 1	1.13551	3.52535e-07	Cytoplasm	other	5
ENSMUSG00000006369	Fbln1	fibulin 1	5.94238	0.0344533	Extracellular Space	other	9
ENSMUSG00000023349	Clec4n	C-type lectin domain containing 6A	2.38737	6.85451e-17	Plasma Membrane	transmembrane receptor	4
ENSMUSG00000006398	Cdc20	cell division cycle 20	2.73831	3.00198e-12	Nucleus	other	5
ENSMUSG00000006435	Neurl1a	neuralized E3 ubiquitin protein ligase 1	5.70543	6.63736e-09	Cytoplasm	enzyme	22
ENSMUSG00000006445	Epha2	EPH receptor A2	9.23817	8.9765e-12	Plasma Membrane	kinase	23
ENSMUSG00000006464	Bbs1	Bardet-Biedl syndrome 1	2.77773	0.0477556	Extracellular Space	other	4
ENSMUSG00000006574	Slc4a1	solute carrier family 4 member 1 (Diego blood group)	-11.3453	8.08441e-19	Plasma Membrane	transporter	1
ENSMUSG00000006651	Aplp1	amyloid beta precursor like protein 1	3.01909	0.00405975	Extracellular Space	other	3
ENSMUSG00000006930	Hap1	huntingtin associated protein 1	3.49459	0.00959245	Cytoplasm	other	10
ENSMUSG00000006931	P3h4	prolyl 3-hydroxylase family member 4 (non-enzymatic)	4.03704	0.0040835	Nucleus	other	4
ENSMUSG00000007039	Ddah2	dimethylarginine dimethylaminohydrolase 2	5.44897	1.48952e-09	Cytoplasm	enzyme	3
ENSMUSG00000007097	Atp1a2	ATPase Na+/K+ transporting subunit alpha 2	6.02917	0.00619806	Plasma Membrane	transporter	8
ENSMUSG00000007411	Mark3	microtubule affinity regulating kinase 3	2.29468	6.06816e-10	Cytoplasm	kinase	1
ENSMUSG00000006389	Mpl	MPL proto-oncogene, thrombopoietin receptor	-10.8626	1.80182e-16	Plasma Membrane	transmembrane receptor	1
ENSMUSG00000007891	Ctsd	cathepsin D	3.05365	3.94716e-32	Cytoplasm	peptidase	2
ENSMUSG00000030256	Bhlhe41	basic helix-loop-helix family, member e41	5.95884	2.65811e-19	Nucleus	transcription regulator	1
ENSMUSG00000008668	Rps18	ribosomal protein S18	-1.40246	5.15129e-10	Cytoplasm	other	4
ENSMUSG00000008730	Hipk1	homeodomain interacting protein kinase 1	-1.17265	0.0005109	Nucleus	kinase	5
ENSMUSG00000009185	Ccl8	chemokine (C-C motif) ligand 8	10.7309	0.000506697	Extracellular Space	other	2
ENSMUSG00000009214	Mymk	myomaker, myoblast fusion factor	7.57555	4.46397e-06	Plasma Membrane	other	1
ENSMUSG00000009350	Mpo	myeloperoxidase	6.38034	2.80715e-08	Cytoplasm	enzyme	1
ENSMUSG00000032515	Csrnp1	cysteine and serine rich nuclear protein 1	2.92225	6.61298e-17	Nucleus	transcription regulator	1
ENSMUSG00000009621	Vav2	vav guanine nucleotide exchange factor 2	1.98835	7.35595e-14	Cytoplasm	transcription regulator	5
ENSMUSG00000009630	Ppp2cb	protein phosphatase 2 catalytic subunit beta	-1.23043	0.00265665	Cytoplasm	phosphatase	1
ENSMUSG00000010660	Plcd1	phospholipase C delta 1	1.8063	0.0248228	Cytoplasm	enzyme	1
ENSMUSG00000011008	Mcoln2	mucolipin 2	2.80018	6.88857e-05	Plasma Membrane	ion channel	2
ENSMUSG00000013076	Amotl1	angiomotin like 1	6.06316	0.0144397	Plasma Membrane	other	13
ENSMUSG00000059325	Hopx	HOP homeobox	-2.53159	4.04981e-16	Nucleus	transcription regulator	1
ENSMUSG00000013236	Ptprs	protein tyrosine phosphatase, receptor type S	1.4726	0.000362015	Plasma Membrane	phosphatase	26
ENSMUSG00000013584	Aldh1a2	aldehyde dehydrogenase 1 family member A2	5.82624	0.000268234	Cytoplasm	enzyme	3
ENSMUSG00000014361	Mertk	MER proto-oncogene, tyrosine kinase	6.17969	1.07582e-05	Plasma Membrane	kinase	4
ENSMUSG00000035352	Ccl12	C-C motif chemokine ligand 2	8.94524	3.23962e-32	Extracellular Space	cytokine	11
ENSMUSG00000014602	Kif1a	kinesin family member 1A	3.45852	0.00217844	Cytoplasm	other	1
ENSMUSG00000031714	Gab1	GRB2 associated binding protein 1	1.76726	3.4165e-08	Cytoplasm	kinase	7
ENSMUSG00000015243	Abca1	ATP binding cassette subfamily A member 1	3.07903	1.67375e-18	Plasma Membrane	transporter	5
ENSMUSG00000027962	Vcam1	vascular cell adhesion molecule 1	9.8444	2.3269e-13	Plasma Membrane	transmembrane receptor	1
ENSMUSG00000027111	Itga6	integrin subunit alpha 6	2.16135	3.65818e-13	Plasma Membrane	transmembrane receptor	13
ENSMUSG00000015340	Cybb	cytochrome b-245 beta chain	-1.31999	4.48509e-13	Cytoplasm	enzyme	5
ENSMUSG00000050675	Gp1ba	glycoprotein Ib platelet subunit alpha	-4.79078	4.6971e-13	Plasma Membrane	transmembrane receptor	1
ENSMUSG00000015468	Notch4	notch 4	2.65225	2.12175e-05	Plasma Membrane	transcription regulator	9
ENSMUSG00000022479	Vdr	vitamin D receptor	3.05774	8.69844e-16	Nucleus	transcription regulator	4
ENSMUSG00000015750	Aph1a	aph-1 homolog A, gamma-secretase subunit	-1.00669	0.0186281	Cytoplasm	peptidase	1
ENSMUSG00000015850	Adamtsl4	ADAMTS like 4	1.3374	0.000655787	Extracellular Space	other	4
ENSMUSG00000015957	Wnt11	Wnt family member 11	6.87611	3.38367e-07	Extracellular Space	other	17
ENSMUSG00000016028	Celsr1	cadherin EGF LAG seven-pass G-type receptor 1	6.16132	0.00496856	Plasma Membrane	G-protein coupled receptor	8
ENSMUSG00000016128	Stard13	StAR related lipid transfer domain containing 13	5.82318	0.0183465	Cytoplasm	other	9
ENSMUSG00000016494	Cd34	CD34 molecule	4.50203	1.36994e-40	Plasma Membrane	other	16
ENSMUSG00000016496	Cd274	CD274 molecule	2.26864	4.65864e-12	Plasma Membrane	enzyme	4
ENSMUSG00000031779	Ccl22	C-C motif chemokine ligand 22	11.9424	1.42659e-20	Extracellular Space	cytokine	2
ENSMUSG00000018476	Kdm6b	lysine demethylase 6B	1.97235	5.74895e-09	Extracellular Space	enzyme	3
ENSMUSG00000016933	Plcg1	phospholipase C gamma 1	1.37939	0.0153691	Cytoplasm	enzyme	19
ENSMUSG00000017009	Sdc4	syndecan 4	5.28448	1.07712e-50	Plasma Membrane	other	11
ENSMUSG00000017132	Cyth1	cytohesin 1	1.15696	3.67837e-07	Cytoplasm	other	7
ENSMUSG00000017144	Rnd3	Rho family GTPase 3	-1.35271	1.21918e-05	Cytoplasm	enzyme	3
ENSMUSG00000017314	Mpp2	membrane palmitoylated protein 2	-5.72617	0.0211904	Plasma Membrane	kinase	6
ENSMUSG00000017386	Traf4	TNF receptor associated factor 4	2.92458	0.000604139	Cytoplasm	other	5
ENSMUSG00000017466	Timp2	TIMP metallopeptidase inhibitor 2	2.99195	3.04653e-27	Extracellular Space	other	6
ENSMUSG00000017493	Igfbp4	insulin like growth factor binding protein 4	1.76418	8.75679e-07	Extracellular Space	other	2
ENSMUSG00000017713	Tha1	threonine aldolase 1	1.74556	0.0337501	Other	other	3
ENSMUSG00000017716	Birc5	baculoviral IAP repeat containing 5	4.05837	7.9699e-13	Cytoplasm	other	5
ENSMUSG00000017721	Pigt	phosphatidylinositol glycan anchor biosynthesis class T	-1.26896	2.65368e-05	Cytoplasm	enzyme	1
ENSMUSG00000024912	Fosl1	FOS like 1, AP-1 transcription factor subunit	5.16394	4.79632e-15	Nucleus	transcription regulator	1
ENSMUSG00000018012	Rac3	Rac family small GTPase 3	2.29248	0.00245066	Cytoplasm	enzyme	7
ENSMUSG00000052684	Jun	Jun proto-oncogene, AP-1 transcription factor subunit	1.93278	1.44652e-14	Nucleus	transcription regulator	24
ENSMUSG00000018217	Pmp22	peripheral myelin protein 22	8.77789	2.94405e-07	Plasma Membrane	other	20
ENSMUSG00000026193	Fn1	fibronectin 1	-1.59862	2.90138e-07	Extracellular Space	enzyme	20
ENSMUSG00000018593	Sparc	secreted protein acidic and cysteine rich	10.6173	4.34923e-24	Extracellular Space	other	15
ENSMUSG00000022893	Adamts1	ADAM metallopeptidase with thrombospondin type 1 motif 1	9.058	1.60996e-10	Extracellular Space	peptidase	17
ENSMUSG00000018736	Ndel1	nudE neurodevelopment protein 1 like 1	1.44637	1.06068e-08	Nucleus	peptidase	18
ENSMUSG00000018765	Fxr2	FMR1 autosomal homolog 2	2.1653	3.2261e-05	Cytoplasm	other	6
ENSMUSG00000000982	Ccl3	C-C motif chemokine ligand 3 like 3	3.10771	1.76637e-20	Extracellular Space	cytokine	9
ENSMUSG00000027399	Il1a	interleukin 1 alpha	11.5084	7.56853e-19	Extracellular Space	cytokine	14
ENSMUSG00000018965	Ywhah	tyrosine 3-monooxygenase/tryptophan 5-monooxygenase activation protein eta	1.19107	2.97031e-05	Cytoplasm	transcription regulator	5
ENSMUSG00000024985	Tcf7l2	transcription factor 7 like 2	1.82969	4.43732e-14	Nucleus	transcription regulator	11
ENSMUSG00000019054	Fis1	fission, mitochondrial 1	-1.02151	3.35734e-06	Cytoplasm	other	4
ENSMUSG00000001131	Timp1	TIMP metallopeptidase inhibitor 1	10.9836	1.98939e-17	Extracellular Space	cytokine	6
ENSMUSG00000019194	Scn1b	sodium voltage-gated channel beta subunit 1	4.48235	4.35735e-12	Plasma Membrane	ion channel	6
ENSMUSG00000019467	Arhgef25	Rho guanine nucleotide exchange factor 25	6.71598	0.000744763	Cytoplasm	other	3
ENSMUSG00000019478	Rab4a	RAB4A, member RAS oncogene family	6.79338	0.000231214	Cytoplasm	enzyme	1
ENSMUSG00000019790	Stxbp5	syntaxin binding protein 5	1.84226	2.32353e-06	Plasma Membrane	other	4
ENSMUSG00000019843	Fyn	FYN proto-oncogene, Src family tyrosine kinase	2.98976	1.21861e-35	Plasma Membrane	kinase	28
ENSMUSG00000039109	F13a1	coagulation factor XIII A chain	-1.07101	4.13413e-05	Extracellular Space	enzyme	2
ENSMUSG00000019850	Tnfaip3	TNF alpha induced protein 3	3.34453	2.59453e-34	Nucleus	enzyme	9
ENSMUSG00000019852	Arfgef3	ARFGEF family member 3	5.6609	0.0186184	Other	other	1
ENSMUSG00000019889	Ptprk	protein tyrosine phosphatase, receptor type K	6.94747	0.000874044	Plasma Membrane	phosphatase	10
ENSMUSG00000019942	Cdk1	cyclin dependent kinase 1	5.29844	3.4583e-17	Nucleus	kinase	1
ENSMUSG00000019944	Rhobtb1	Rho related BTB domain containing 1	3.7992	4.86235e-06	Other	enzyme	3
ENSMUSG00000031451	Gas6	growth arrest specific 6	12.8167	3.63815e-23	Extracellular Space	growth factor	7
ENSMUSG00000061878	Sphk1	sphingosine kinase 1	7.07429	4.11824e-08	Cytoplasm	kinase	8
ENSMUSG00000019987	Arg1	arginase 1	7.28714	1.84625e-70	Cytoplasm	enzyme	4
ENSMUSG00000000489	Pdgfb	platelet derived growth factor subunit B	2.73489	5.80018e-17	Extracellular Space	growth factor	34
ENSMUSG00000020019	Ntn4	netrin 4	6.19338	0.0124901	Extracellular Space	other	5
ENSMUSG00000020027	Socs2	suppressor of cytokine signaling 2	3.3547	5.32292e-09	Cytoplasm	other	2
ENSMUSG00000020044	Timp3	TIMP metallopeptidase inhibitor 3	4.39303	0.00405639	Extracellular Space	other	3
ENSMUSG00000027276	Jag1	jagged 1	3.83391	1.28903e-14	Extracellular Space	growth factor	8
ENSMUSG00000020091	Eif4ebp2	eukaryotic translation initiation factor 4E binding protein 2	-1.75241	1.92234e-07	Cytoplasm	translation regulator	1
ENSMUSG00000020120	Plek	pleckstrin	1.01926	0.000334489	Cytoplasm	transcription regulator	1
ENSMUSG00000024164	C3	complement C3	-1.65461	2.2561e-08	Extracellular Space	peptidase	9
ENSMUSG00000020175	Rab36	RAB36, member RAS oncogene family	-1.6868	0.00846186	Cytoplasm	enzyme	1
ENSMUSG00000020181	Nav3	neuron navigator 3	9.02901	2.33007e-10	Nucleus	other	1
ENSMUSG00000031665	Sall1	spalt like transcription factor 1	10.1945	1.45431e-13	Nucleus	transcription regulator	5
ENSMUSG00000002881	Nab1	NGFI-A binding protein 1	1.83767	1.53091e-13	Nucleus	transcription regulator	1
ENSMUSG00000020230	Prmt2	protein arginine methyltransferase 2	1.98417	3.03367e-06	Nucleus	enzyme	1
ENSMUSG00000020423	Btg2	BTG anti-proliferation factor 2	1.76966	2.4332e-13	Nucleus	transcription regulator	7
ENSMUSG00000020282	Rhbdf1	rhomboid 5 homolog 1	1.96188	0.0294228	Cytoplasm	other	2
ENSMUSG00000020349	Ppp2ca	protein phosphatase 2 catalytic subunit alpha	2.41737	8.58827e-18	Cytoplasm	phosphatase	5
ENSMUSG00000020372	Rack1	receptor for activated C kinase 1	-1.03997	0.000399006	Cytoplasm	enzyme	3
ENSMUSG00000020388	Pdlim4	PDZ and LIM domain 4	1.57245	0.00016626	Plasma Membrane	other	2
ENSMUSG00000022433	Csnk1e	casein kinase 1 epsilon	1.44493	1.25027e-07	Cytoplasm	kinase	8
ENSMUSG00000020399	Havcr2	hepatitis A virus cellular receptor 2	2.60677	4.64184e-22	Plasma Membrane	other	7
ENSMUSG00000001289	Pfdn5	prefoldin subunit 5	-1.47771	5.51635e-12	Nucleus	transcription regulator	5
ENSMUSG00000020424	Castor1	cytosolic arginine sensor for mTORC1 subunit 1	1.66754	7.20717e-06	Cytoplasm	other	1
ENSMUSG00000020473	Aebp1	AE binding protein 1	6.56141	0.00125818	Nucleus	peptidase	3
ENSMUSG00000020475	Pgam2	phosphoglycerate mutase 2	-1.23552	0.0344133	Cytoplasm	phosphatase	1
ENSMUSG00000020483	Dynll2	dynein light chain LC8-type 2	1.37811	0.0085499	Cytoplasm	other	4
ENSMUSG00000020534	Shmt1	serine hydroxymethyltransferase 1	2.0541	0.000131667	Cytoplasm	enzyme	3
ENSMUSG00000020395	Itk	IL2 inducible T cell kinase	1.96184	1.66647e-07	Cytoplasm	kinase	2
ENSMUSG00000020592	Sdc1	syndecan 1	3.291	6.69858e-24	Plasma Membrane	enzyme	4
ENSMUSG00000020599	Rgs9	regulator of G protein signaling 9	6.18564	0.0033652	Cytoplasm	enzyme	4
ENSMUSG00000020642	Rnf144a	ring finger protein 144A	-1.3461	2.95147e-05	Nucleus	enzyme	1
ENSMUSG00000020654	Adcy3	adenylate cyclase 3	2.29816	0.0026306	Plasma Membrane	enzyme	1
ENSMUSG00000058794	Nfe2	nuclear factor, erythroid 2	-1.49399	1.09311e-11	Nucleus	transcription regulator	1
ENSMUSG00000020657	Dnajc27	DnaJ heat shock protein family (Hsp40) member C27	1.26136	0.0447839	Cytoplasm	enzyme	1
ENSMUSG00000020669	Sh3yl1	SH3 and SYLF domain containing 1	-4.1529	0.00542545	Plasma Membrane	other	2
ENSMUSG00000078810	Gp6	glycoprotein VI platelet	-5.69789	1.21301e-12	Plasma Membrane	transmembrane receptor	1
ENSMUSG00000027995	Tlr2	toll like receptor 2	1.55033	3.23056e-12	Plasma Membrane	transmembrane receptor	15
ENSMUSG00000032501	Trib1	tribbles pseudokinase 1	1.57163	1.7065e-07	Cytoplasm	kinase	5
ENSMUSG00000020717	Pecam1	platelet and endothelial cell adhesion molecule 1	1.0013	0.00160563	Plasma Membrane	other	7
ENSMUSG00000020802	Ube2o	ubiquitin conjugating enzyme E2 O	-2.95153	3.92028e-16	Nucleus	enzyme	1
ENSMUSG00000020838	Slc6a4	solute carrier family 6 member 4	-7.6404	4.10661e-10	Plasma Membrane	transporter	5
ENSMUSG00000020859	Spag9	sperm associated antigen 9	1.08349	7.66795e-05	Cytoplasm	other	1
ENSMUSG00000020932	Gfap	glial fibrillary acidic protein	5.68159	0.0305538	Cytoplasm	other	6
ENSMUSG00000021013	Ttc8	tetratricopeptide repeat domain 8	3.26839	0.00987148	Cytoplasm	other	4
ENSMUSG00000021025	Nfkbia	NFKB inhibitor alpha	1.10843	1.29154e-05	Cytoplasm	transcription regulator	2
ENSMUSG00000021057	Akap5	A-kinase anchoring protein 5	3.73987	0.0382283	Plasma Membrane	other	14
ENSMUSG00000021062	Rab15	RAB15, member RAS oncogene family	6.111	0.00650747	Cytoplasm	enzyme	1
ENSMUSG00000028654	Mycl	MYCL proto-oncogene, bHLH transcription factor	3.59488	3.97236e-11	Nucleus	transcription regulator	1
ENSMUSG00000021125	Arg2	arginase 2	1.77411	0.000255538	Cytoplasm	enzyme	2
ENSMUSG00000021109	Hif1a	hypoxia inducible factor 1 subunit alpha	1.46689	7.11624e-11	Nucleus	transcription regulator	29
ENSMUSG00000021190	Lgmn	legumain	2.18176	3.53503e-33	Cytoplasm	peptidase	15
ENSMUSG00000021215	Net1	neuroepithelial cell transforming 1	3.70394	3.30811e-12	Nucleus	other	4
ENSMUSG00000021238	Aldh6a1	aldehyde dehydrogenase 6 family member A1	1.11093	0.0302098	Cytoplasm	enzyme	2
ENSMUSG00000047407	Tgif1	TGFB induced factor homeobox 1	1.73071	2.94429e-09	Nucleus	transcription regulator	1
ENSMUSG00000029999	Tgfa	transforming growth factor alpha	9.41912	5.42032e-11	Extracellular Space	growth factor	3
ENSMUSG00000021285	Ppp1r13b	protein phosphatase 1 regulatory subunit 13B	2.87991	1.47382e-12	Cytoplasm	phosphatase	1
ENSMUSG00000021338	Carmil1	capping protein regulator and myosin 1 linker 1	4.11387	3.34499e-24	Cytoplasm	enzyme	3
ENSMUSG00000028042	Zbtb7b	zinc finger and BTB domain containing 7B	-1.96851	5.65888e-09	Nucleus	transcription regulator	1
ENSMUSG00000021477	Ctsl	cathepsin V	2.06617	1.98939e-17	Cytoplasm	peptidase	2
ENSMUSG00000021493	Pdlim7	PDZ and LIM domain 7	1.27031	0.00107826	Cytoplasm	other	4
ENSMUSG00000019122	Ccl9	chemokine (C-C motif) ligand 9	-1.33545	3.18159e-12	Extracellular Space	cytokine	2
ENSMUSG00000020580	Rock2	Rho associated coiled-coil containing protein kinase 2	1.05269	5.04734e-06	Cytoplasm	kinase	28
ENSMUSG00000021614	Vcan	versican	-1.05705	0.000474095	Extracellular Space	other	2
ENSMUSG00000021665	Hexb	hexosaminidase subunit beta	2.44487	9.46502e-16	Cytoplasm	enzyme	1
ENSMUSG00000021684	Pde8b	phosphodiesterase 8B	-1.29632	0.00686094	Cytoplasm	enzyme	1
ENSMUSG00000021697	Depdc1b	DEP domain containing 1B	2.11633	0.0185501	Cytoplasm	other	3
ENSMUSG00000021701	Plk2	polo like kinase 2	3.04214	2.36671e-24	Nucleus	kinase	19
ENSMUSG00000021719	Rgs7bp	regulator of G protein signaling 7 binding protein	6.81532	0.000320093	Cytoplasm	other	6
ENSMUSG00000021720	Rnf180	ring finger protein 180	4.66342	7.77689e-26	Cytoplasm	enzyme	3
ENSMUSG00000021728	Emb	embigin	-1.09578	8.59332e-10	Plasma Membrane	transporter	2
ENSMUSG00000057058	Skap1	src kinase associated phosphoprotein 1	1.90482	5.59526e-06	Cytoplasm	kinase	1
ENSMUSG00000021796	Bmpr1a	bone morphogenetic protein receptor type 1A	3.69508	0.0400795	Plasma Membrane	kinase	13
ENSMUSG00000031740	Mmp2	matrix metallopeptidase 2	3.23076	9.78888e-06	Extracellular Space	peptidase	18
ENSMUSG00000021831	Ero1l	endoplasmic reticulum oxidoreductase 1 alpha	1.23257	2.67895e-05	Cytoplasm	enzyme	2
ENSMUSG00000021939	Ctsb	cathepsin B	1.27053	4.84355e-10	Cytoplasm	peptidase	5
ENSMUSG00000021983	Atp8a2	ATPase phospholipid transporting 8A2	9.90538	2.79697e-13	Plasma Membrane	transporter	5
ENSMUSG00000022018	Rgcc	regulator of cell cycle	2.50483	5.8693e-09	Cytoplasm	other	18
ENSMUSG00000022026	Olfm4	olfactomedin 4	5.976	0.0276533	Extracellular Space	other	1
ENSMUSG00000022037	Clu	clusterin	-3.10416	3.16987e-17	Cytoplasm	other	7
ENSMUSG00000022091	Sorbs3	sorbin and SH3 domain containing 3	4.24673	2.52422e-05	Cytoplasm	other	3
ENSMUSG00000022098	Bmp1	bone morphogenetic protein 1	7.22595	4.16512e-05	Extracellular Space	peptidase	3
ENSMUSG00000022102	Dok2	docking protein 2	1.80199	1.40078e-16	Plasma Membrane	other	1
ENSMUSG00000022114	Spry2	sprouty RTK signaling antagonist 2	4.54799	3.01972e-22	Plasma Membrane	other	6
ENSMUSG00000022122	Ednrb	endothelin receptor type B	2.29198	6.73332e-05	Plasma Membrane	G-protein coupled receptor	5
ENSMUSG00000022150	Dab2	DAB2, clathrin adaptor protein	10.7412	1.22363e-10	Plasma Membrane	other	18
ENSMUSG00000022218	Tgm1	transglutaminase 1	-1.28515	0.0327484	Plasma Membrane	enzyme	2
ENSMUSG00000059901	Adamts14	ADAM metallopeptidase with thrombospondin type 1 motif 14	1.69656	0.000111244	Extracellular Space	peptidase	2
ENSMUSG00000022951	Rcan1	regulator of calcineurin 1	1.44213	8.11204e-09	Nucleus	transcription regulator	1
ENSMUSG00000022240	Ctnnd2	catenin delta 2	4.87577	3.33723e-12	Plasma Membrane	other	23
ENSMUSG00000000409	Lck	LCK proto-oncogene, Src family tyrosine kinase	1.65908	7.79309e-06	Cytoplasm	kinase	3
ENSMUSG00000022270	Retreg1	reticulophagy regulator 1	1.22147	0.000373325	Cytoplasm	other	5
ENSMUSG00000022303	Dcstamp	dendrocyte expressed seven transmembrane protein	5.17175	9.03157e-07	Plasma Membrane	other	3
ENSMUSG00000020695	Mrc2	mannose receptor C type 2	8.83317	7.81536e-10	Plasma Membrane	transmembrane receptor	3
ENSMUSG00000022311	Csmd3	CUB and Sushi multiple domains 3	7.94497	4.40151e-07	Plasma Membrane	enzyme	2
ENSMUSG00000022322	Shcbp1	SHC binding and spindle associated 1	7.37833	7.72915e-07	Other	other	1
ENSMUSG00000022324	Matn2	matrilin 2	1.92261	0.0306108	Extracellular Space	other	10
ENSMUSG00000038533	Cbfa2t2	CBFA2/RUNX1 translocation partner 2	1.53934	9.02341e-09	Nucleus	transcription regulator	5
ENSMUSG00000022371	Col14a1	collagen type XIV alpha 1 chain	5.96068	0.0078861	Extracellular Space	other	5
ENSMUSG00000022425	Enpp2	ectonucleotide pyrophosphatase/phosphodiesterase 2	12.8738	3.71685e-11	Plasma Membrane	enzyme	11
ENSMUSG00000059923	Grb2	growth factor receptor bound protein 2	1.0899	1.08913e-05	Cytoplasm	kinase	5
ENSMUSG00000022438	Parvb	parvin beta	-1.622	0.000122912	Cytoplasm	other	5
ENSMUSG00000022439	Parvg	parvin gamma	1.47292	2.70182e-11	Cytoplasm	other	4
ENSMUSG00000022456	Sept3	septin 3	5.00303	0.0229947	Cytoplasm	enzyme	1
ENSMUSG00000025223	Ldb1	LIM domain binding 1	1.8012	1.00825e-08	Nucleus	transcription regulator	9
ENSMUSG00000024927	Rela	RELA proto-oncogene, NF-kB subunit	1.12813	1.26407e-08	Nucleus	transcription regulator	1
ENSMUSG00000022512	Cldn1	claudin 1	7.47552	6.02544e-07	Plasma Membrane	other	15
ENSMUSG00000037868	Egr2	early growth response 2	5.22418	5.85079e-08	Nucleus	transcription regulator	3
ENSMUSG00000022548	Apod	apolipoprotein D	3.40472	0.00127828	Extracellular Space	transporter	10
ENSMUSG00000022555	Dgat1	diacylglycerol O-acyltransferase 1	1.04662	0.000487436	Cytoplasm	enzyme	1
ENSMUSG00000022568	Scrib	scribbled planar cell polarity protein	-1.3828	0.0147256	Cytoplasm	other	10
ENSMUSG00000022602	Arc	activity regulated cytoskeleton associated protein	4.02558	6.11122e-07	Cytoplasm	other	18
ENSMUSG00000002997	Prkar2b	protein kinase cAMP-dependent type II regulatory subunit beta	-1.41491	1.13738e-05	Cytoplasm	kinase	3
ENSMUSG00000022661	Cd200	CD200 molecule	3.27988	5.26191e-10	Plasma Membrane	other	1
ENSMUSG00000024565	Sall3	spalt like transcription factor 3	8.32586	6.15589e-08	Nucleus	transcription regulator	1
ENSMUSG00000022797	Tfrc	transferrin receptor	2.97776	4.85088e-05	Plasma Membrane	transporter	3
ENSMUSG00000022812	Gsk3b	glycogen synthase kinase 3 beta	1.50735	4.49712e-08	Nucleus	kinase	42
ENSMUSG00000022817	Itgb5	integrin subunit beta 5	4.5369	4.05996e-62	Plasma Membrane	other	9
ENSMUSG00000004798	Ulk2	unc-51 like autophagy activating kinase 2	1.3007	1.52181e-05	Cytoplasm	kinase	6
ENSMUSG00000022837	Iqcb1	IQ motif containing B1	1.53352	0.0345285	Extracellular Space	other	1
ENSMUSG00000022864	D16Ertd472e	chromosome 21 open reading frame 91	1.58077	1.36902e-05	Other	other	8
ENSMUSG00000020689	Itgb3	integrin subunit beta 3	-1.88608	1.04752e-09	Plasma Membrane	transmembrane receptor	40
ENSMUSG00000022878	Adipoq	adiponectin, C1Q and collagen domain containing	-5.80055	0.0181225	Extracellular Space	other	8
ENSMUSG00000025355	Mmp19	matrix metallopeptidase 19	1.18643	0.000347971	Extracellular Space	peptidase	3
ENSMUSG00000002944	Cd36	CD36 molecule	1.82263	5.26777e-09	Plasma Membrane	transmembrane receptor	13
ENSMUSG00000032035	Ets1	ETS proto-oncogene 1, transcription factor	1.85182	9.63736e-08	Nucleus	transcription regulator	12
ENSMUSG00000022994	Adcy6	adenylate cyclase 6	5.11947	0.0165861	Plasma Membrane	enzyme	3
ENSMUSG00000002108	Nr1h3	nuclear receptor subfamily 1 group H member 3	1.58405	4.89389e-06	Nucleus	ligand-dependent nuclear receptor	1
ENSMUSG00000023067	Cdkn1a	cyclin dependent kinase inhibitor 1A	2.91508	3.96982e-30	Nucleus	kinase	4
ENSMUSG00000023072	Cep89	centrosomal protein 89	1.46691	0.0346008	Cytoplasm	other	1
ENSMUSG00000023118	Sympk	symplekin	-1.17214	0.00686094	Cytoplasm	other	4
ENSMUSG00000023191	P3h3	prolyl 3-hydroxylase 3	4.4547	0.00017456	Nucleus	enzyme	1
ENSMUSG00000031778	Cx3cl1	C-X3-C motif chemokine ligand 1	9.20166	2.82908e-11	Extracellular Space	cytokine	24
ENSMUSG00000023328	Ache	acetylcholinesterase (Cartwright blood group)	-2.40953	0.0310399	Plasma Membrane	enzyme	18
ENSMUSG00000026073	Il1r2	interleukin 1 receptor type 2	4.32355	6.04625e-09	Plasma Membrane	transmembrane receptor	4
ENSMUSG00000023460	Rab12	RAB12, member RAS oncogene family	1.87812	7.52414e-05	Cytoplasm	enzyme	1
ENSMUSG00000023473	Celsr3	cadherin EGF LAG seven-pass G-type receptor 3	-2.19966	0.000110152	Plasma Membrane	G-protein coupled receptor	8
ENSMUSG00000023505	Cdca3	cell division cycle associated 3	2.71434	2.06716e-06	Cytoplasm	other	2
ENSMUSG00000023830	Igf2r	insulin like growth factor 2 receptor	2.12972	1.01644e-08	Plasma Membrane	transmembrane receptor	2
ENSMUSG00000023885	Thbs2	thrombospondin 2	7.88294	0.00109506	Extracellular Space	other	8
ENSMUSG00000023903	Mmp25	matrix metallopeptidase 25	2.8334	0.00174369	Plasma Membrane	peptidase	1
ENSMUSG00000023905	Tnfrsf12a	TNF receptor superfamily member 12A	2.04381	2.6534e-08	Plasma Membrane	transmembrane receptor	11
ENSMUSG00000023959	Clic5	chloride intracellular channel 5	5.6495	0.0297081	Cytoplasm	ion channel	1
ENSMUSG00000024011	Pi16	peptidase inhibitor 16	-2.07743	3.05219e-14	Extracellular Space	other	1
ENSMUSG00000024012	Mtch1	mitochondrial carrier 1	2.03804	1.8848e-08	Cytoplasm	other	1
ENSMUSG00000020700	Map3k3	mitogen-activated protein kinase kinase kinase 3	1.2327	2.38525e-05	Cytoplasm	kinase	12
ENSMUSG00000024030	Abcg1	ATP binding cassette subfamily G member 1	1.75791	4.99296e-14	Plasma Membrane	transporter	1
ENSMUSG00000024044	Epb41l3	erythrocyte membrane protein band 4.1 like 3	4.97776	1.11716e-14	Plasma Membrane	other	10
ENSMUSG00000024056	Ndc80	NDC80, kinetochore complex component	3.77738	1.21719e-05	Nucleus	other	1
ENSMUSG00000024098	Twsg1	twisted gastrulation BMP signaling modulator 1	1.38862	1.1907e-05	Extracellular Space	other	7
ENSMUSG00000024163	Mapk8ip3	mitogen-activated protein kinase 8 interacting protein 3	1.36535	0.000218342	Cytoplasm	other	9
ENSMUSG00000064023	Klk8	kallikrein related peptidase 8	1.9319	0.000383119	Extracellular Space	peptidase	10
ENSMUSG00000024168	Tmem204	transmembrane protein 204	3.21677	0.000640743	Plasma Membrane	other	1
ENSMUSG00000024182	Axin1	axin 1	1.26344	0.00875158	Cytoplasm	other	16
ENSMUSG00000024190	Dusp1	dual specificity phosphatase 1	2.09538	1.06443e-23	Nucleus	phosphatase	1
ENSMUSG00000008305	Tle1	transducin like enhancer of split 1	1.40564	2.27119e-07	Nucleus	transcription regulator	5
ENSMUSG00000024232	Bambi	BMP and activin membrane bound inhibitor	3.26829	3.81474e-21	Plasma Membrane	other	11
ENSMUSG00000021250	Fos	Fos proto-oncogene, AP-1 transcription factor subunit	1.59467	4.06404e-07	Nucleus	transcription regulator	4
ENSMUSG00000024330	Col11a2	collagen type XI alpha 2 chain	3.65606	0.00146647	Extracellular Space	other	4
ENSMUSG00000024392	Bag6	BCL2 associated athanogene 6	-1.07407	0.0289129	Nucleus	enzyme	1
ENSMUSG00000024397	Aif1	allograft inflammatory factor 1	1.11822	5.39307e-05	Nucleus	other	11
ENSMUSG00000035385	Ccl2	chemokine (C-C motif) ligand 2	4.48158	3.48405e-11	Extracellular Space	cytokine	16
ENSMUSG00000024423	Impact	impact RWD domain protein	2.15263	5.98069e-10	Cytoplasm	other	3
ENSMUSG00000024962	Vegfb	vascular endothelial growth factor B	3.69877	2.51118e-10	Extracellular Space	growth factor	16
ENSMUSG00000024501	Dpysl3	dihydropyrimidinase like 3	6.31117	0.0405879	Cytoplasm	enzyme	6
ENSMUSG00000024511	Rab27b	RAB27B, member RAS oncogene family	-3.42891	0.0142478	Cytoplasm	enzyme	1
ENSMUSG00000024521	Pmaip1	phorbol-12-myristate-13-acetate-induced protein 1	1.99043	4.14766e-09	Cytoplasm	other	4
ENSMUSG00000024533	Spire1	spire type actin nucleation factor 1	3.07978	1.35284e-10	Cytoplasm	other	2
ENSMUSG00000024534	Sncaip	synuclein alpha interacting protein	5.94322	5.29828e-05	Cytoplasm	transcription regulator	1
ENSMUSG00000024544	Ldlrad4	low density lipoprotein receptor class A domain containing 4	1.66749	0.00402659	Cytoplasm	other	6
ENSMUSG00000021127	Zfp36l1	ZFP36 ring finger protein like 1	1.62235	2.20004e-06	Nucleus	transcription regulator	4
ENSMUSG00000024588	Fech	ferrochelatase	-1.99745	5.44769e-25	Cytoplasm	enzyme	1
ENSMUSG00000024608	Rps14	ribosomal protein S14	-1.47721	9.70739e-12	Cytoplasm	translation regulator	4
ENSMUSG00000024610	Cd74	CD74 molecule	1.65353	3.50304e-08	Plasma Membrane	transmembrane receptor	2
ENSMUSG00000024639	Gnaq	G protein subunit alpha q	1.10036	0.000416568	Plasma Membrane	enzyme	10
ENSMUSG00000031925	Maml2	mastermind like transcriptional coactivator 2	1.95341	2.26819e-06	Nucleus	transcription regulator	1
ENSMUSG00000024666	Tmem138	transmembrane protein 138	1.00833	0.0119109	Extracellular Space	other	1
ENSMUSG00000024667	Tmem216	transmembrane protein 216	1.23422	0.0264983	Extracellular Space	other	1
ENSMUSG00000030748	Il4ra	interleukin 4 receptor	1.20855	5.8965e-08	Plasma Membrane	transmembrane receptor	4
ENSMUSG00000024750	Zfand5	zinc finger AN1-type containing 5	1.70203	1.9541e-15	Nucleus	other	1
ENSMUSG00000024772	Ehd1	EH domain containing 1	1.50277	3.28942e-10	Cytoplasm	other	4
ENSMUSG00000021754	Map3k1	mitogen-activated protein kinase kinase kinase 1	1.02605	4.23965e-05	Cytoplasm	kinase	3
ENSMUSG00000024795	Kif20b	kinesin family member 20B	2.14036	0.00477136	Nucleus	enzyme	2
ENSMUSG00000024798	Htr7	5-hydroxytryptamine receptor 7	10.0155	3.00389e-14	Plasma Membrane	G-protein coupled receptor	8
ENSMUSG00000024811	Tnks2	tankyrase 2	1.24743	2.67729e-05	Nucleus	enzyme	5
ENSMUSG00000024897	Apba1	amyloid beta precursor protein binding family A member 1	-1.67892	0.000560488	Cytoplasm	transporter	3
ENSMUSG00000024909	Efemp2	EGF containing fibulin extracellular matrix protein 2	1.91037	0.000261751	Extracellular Space	other	4
ENSMUSG00000024206	Rfx2	regulatory factor X2	-1.40147	2.44221e-06	Nucleus	transcription regulator	1
ENSMUSG00000021356	Irf4	interferon regulatory factor 4	-1.46391	3.04962e-06	Nucleus	transcription regulator	4
ENSMUSG00000024940	Ltbp3	latent transforming growth factor beta binding protein 3	3.03197	9.75241e-05	Extracellular Space	other	9
ENSMUSG00000024942	Capn1	calpain 1	-1.29084	0.0125042	Cytoplasm	peptidase	1
ENSMUSG00000025856	Pdgfa	platelet derived growth factor subunit A	2.8388	1.76592e-09	Extracellular Space	growth factor	6
ENSMUSG00000036306	Lzts1	leucine zipper tumor suppressor 1	4.12202	4.20239e-06	Nucleus	transcription regulator	10
ENSMUSG00000025008	Tctn3	tectonic family member 3	1.32599	0.0273226	Cytoplasm	other	1
ENSMUSG00000025026	Add3	adducin 3	-1.2945	4.88553e-08	Cytoplasm	other	8
ENSMUSG00000025060	Slk	STE20 like kinase	1.1112	0.00887738	Nucleus	kinase	7
ENSMUSG00000025085	Ablim1	actin binding LIM protein 1	1.18144	0.0363847	Cytoplasm	other	7
ENSMUSG00000025190	Got1	glutamic-oxaloacetic transaminase 1	3.75542	7.42229e-37	Cytoplasm	enzyme	9
ENSMUSG00000025195	Dnmbp	dynamin binding protein	1.02738	0.0287746	Cytoplasm	other	3
ENSMUSG00000043716	Rpl7	ribosomal protein L7	-1.53092	4.2133e-06	Nucleus	transcription regulator	4
ENSMUSG00000025235	Bbs4	Bardet-Biedl syndrome 4	1.71686	0.00200154	Cytoplasm	other	6
ENSMUSG00000025340	Rabgef1	RAB guanine nucleotide exchange factor 1	2.14635	5.23665e-09	Cytoplasm	enzyme	3
ENSMUSG00000025351	Cd63	CD63 molecule	5.66664	7.29257e-07	Plasma Membrane	other	2
ENSMUSG00000021822	Plau	plasminogen activator, urokinase	2.69418	0.00041628	Extracellular Space	peptidase	4
ENSMUSG00000025372	Baiap2	BAI1 associated protein 2	1.13035	0.000132124	Plasma Membrane	kinase	23
ENSMUSG00000058427	Cxcl2	C-X-C motif chemokine ligand 3	2.78873	7.86493e-10	Extracellular Space	cytokine	2
ENSMUSG00000022528	Hes1	hes family bHLH transcription factor 1	1.33158	5.72766e-06	Nucleus	transcription regulator	7
ENSMUSG00000048450	Msx1	msh homeobox 1	7.60934	9.06602e-06	Nucleus	transcription regulator	2
ENSMUSG00000025432	Avil	advillin	2.94604	0.0262626	Plasma Membrane	other	4
ENSMUSG00000025437	Usp33	ubiquitin specific peptidase 33	1.21979	0.0173202	Cytoplasm	peptidase	5
ENSMUSG00000025473	Adam8	ADAM metallopeptidase domain 8	4.11872	3.19751e-40	Plasma Membrane	peptidase	13
ENSMUSG00000025499	Hras	HRas proto-oncogene, GTPase	1.59073	2.3694e-07	Plasma Membrane	enzyme	10
ENSMUSG00000025510	Cd151	CD151 molecule (Raph blood group)	-1.1877	0.0395181	Plasma Membrane	other	4
ENSMUSG00000025511	Tspan4	tetraspanin 4	2.6965	1.00591e-13	Plasma Membrane	other	1
ENSMUSG00000025578	Cbx8	chromobox 8	-1.3618	0.00197982	Nucleus	other	2
ENSMUSG00000029417	Cxcl9	chemokine (C-X-C motif) ligand 9	2.46607	9.35919e-10	Extracellular Space	cytokine	2
ENSMUSG00000025780	Itih5	inter-alpha-trypsin inhibitor heavy chain family member 5	1.89386	0.000717675	Plasma Membrane	other	2
ENSMUSG00000025794	Rpl14	ribosomal protein L14	-1.00286	4.4159e-05	Cytoplasm	other	4
ENSMUSG00000025804	Ccr1	C-C motif chemokine receptor 1	1.47974	3.66007e-09	Plasma Membrane	G-protein coupled receptor	1
ENSMUSG00000058488	Kl	klotho	7.26406	6.90323e-05	Extracellular Space	enzyme	3
ENSMUSG00000035064	Eef2k	eukaryotic elongation factor 2 kinase	1.62248	6.56649e-05	Cytoplasm	kinase	21
ENSMUSG00000029378	Areg	amphiregulin	5.10204	5.79955e-08	Extracellular Space	growth factor	4
ENSMUSG00000025857	Dnaaf5	dynein axonemal assembly factor 5	2.84711	2.1652e-17	Cytoplasm	other	1
ENSMUSG00000025860	Xiap	X-linked inhibitor of apoptosis	-1.31196	0.000135227	Cytoplasm	enzyme	10
ENSMUSG00000070691	Runx3	runt related transcription factor 3	1.28369	9.20807e-06	Nucleus	transcription regulator	3
ENSMUSG00000025889	Snca	synuclein alpha	-11.0878	1.41218e-57	Cytoplasm	enzyme	11
ENSMUSG00000025920	Stau2	staufen double-stranded RNA binding protein 2	2.15734	0.0327902	Cytoplasm	other	17
ENSMUSG00000025932	Eya1	EYA transcriptional coactivator and phosphatase 1	3.50738	0.0405879	Nucleus	phosphatase	3
ENSMUSG00000025969	Nrp2	neuropilin 2	1.72025	3.899e-06	Plasma Membrane	kinase	10
ENSMUSG00000025993	Slc40a1	solute carrier family 40 member 1	4.55848	0.0219258	Plasma Membrane	transporter	1
ENSMUSG00000031639	Tlr3	toll like receptor 3	2.62938	8.42576e-08	Plasma Membrane	transmembrane receptor	5
ENSMUSG00000026014	Raph1	Ras association (RalGDS/AF-6) and pleckstrin homology domains 1	-1.46565	4.83096e-05	Plasma Membrane	other	4
ENSMUSG00000074785	Plxnc1	plexin C1	1.56581	2.27119e-07	Plasma Membrane	transmembrane receptor	7
ENSMUSG00000022305	Lrp12	LDL receptor related protein 12	3.02252	3.20465e-07	Plasma Membrane	transmembrane receptor	1
ENSMUSG00000027009	Itga4	integrin subunit alpha 4	-1.12598	5.03959e-07	Plasma Membrane	transmembrane receptor	15
ENSMUSG00000026117	Zap70	zeta chain of T cell receptor associated protein kinase 70	1.36031	0.00554041	Plasma Membrane	kinase	1
ENSMUSG00000026121	Sema4c	semaphorin 4C	5.61119	0.000310106	Plasma Membrane	other	10
ENSMUSG00000026131	Dst	dystonin	2.11001	8.61151e-05	Plasma Membrane	other	13
ENSMUSG00000026187	Xrcc5	X-ray repair cross complementing 5	3.77152	0.000664175	Nucleus	enzyme	2
ENSMUSG00000064246	Chil1	chitinase 3 like 1	4.49727	0.000548455	Extracellular Space	enzyme	5
ENSMUSG00000026228	Htr2b	5-hydroxytryptamine receptor 2B	8.32542	4.57306e-08	Plasma Membrane	G-protein coupled receptor	10
ENSMUSG00000026249	Serpine2	serpin family E member 2	4.80826	6.44373e-27	Extracellular Space	other	5
ENSMUSG00000036432	Siah2	siah E3 ubiquitin protein ligase 2	1.72879	1.07582e-05	Nucleus	transcription regulator	5
ENSMUSG00000030149	Klrk1	killer cell lectin-like receptor subfamily K, member 1	1.68995	6.23605e-07	Plasma Membrane	transmembrane receptor	4
ENSMUSG00000026385	Dbi	diazepam binding inhibitor, acyl-CoA binding protein	-1.00955	8.28413e-06	Cytoplasm	other	2
ENSMUSG00000026576	Atp1b1	ATPase Na+/K+ transporting subunit beta 1	1.27132	0.0305424	Plasma Membrane	transporter	1
ENSMUSG00000026639	Lamb3	laminin subunit beta 3	1.76412	0.00824329	Extracellular Space	transporter	3
ENSMUSG00000021508	Cxcl14	C-X-C motif chemokine ligand 14	8.35517	1.09267e-08	Extracellular Space	cytokine	2
ENSMUSG00000026748	Plxdc2	plexin domain containing 2	6.91	4.54962e-51	Extracellular Space	other	2
ENSMUSG00000070942	Il1rl2	interleukin 1 receptor like 2	2.49981	1.58882e-06	Plasma Membrane	transmembrane receptor	1
ENSMUSG00000037493	Cib2	calcium and integrin binding family member 2	-1.13512	6.98179e-05	Cytoplasm	kinase	5
ENSMUSG00000026796	Fam129b	family with sequence similarity 129 member B	1.13993	0.00230945	Cytoplasm	transcription regulator	1
ENSMUSG00000026797	Stxbp1	syntaxin binding protein 1	2.10063	0.00965535	Cytoplasm	transporter	8
ENSMUSG00000031618	Nr3c2	nuclear receptor subfamily 3 group C member 2	4.94222	0.00158544	Nucleus	ligand-dependent nuclear receptor	5
ENSMUSG00000026833	Olfm1	olfactomedin 1	1.01557	0.013871	Cytoplasm	other	7
ENSMUSG00000026864	Hspa5	heat shock protein family A (Hsp70) member 5	1.43759	6.25749e-09	Cytoplasm	enzyme	9
ENSMUSG00000026875	Traf1	TNF receptor associated factor 1	2.46625	2.65101e-15	Cytoplasm	other	1
ENSMUSG00000026921	Egfl7	EGF like domain multiple 7	5.18825	0.0184359	Extracellular Space	other	8
ENSMUSG00000026955	Sapcd2	suppressor APC domain containing 2	4.21807	0.0156955	Nucleus	other	5
ENSMUSG00000004814	Ccl24	C-C motif chemokine ligand 24	3.6324	1.61796e-07	Extracellular Space	cytokine	9
ENSMUSG00000007655	Cav1	caveolin 1	7.141	2.09927e-06	Plasma Membrane	transmembrane receptor	34
ENSMUSG00000027072	Prg3	proteoglycan 3, pro eosinophil major basic protein 2	5.67549	2.42635e-05	Extracellular Space	other	4
ENSMUSG00000027073	Prg2	proteoglycan 2, pro eosinophil major basic protein	7.5814	7.81536e-10	Extracellular Space	other	6
ENSMUSG00000029075	Tnfrsf4	TNF receptor superfamily member 4	3.41983	2.55706e-06	Plasma Membrane	transmembrane receptor	2
ENSMUSG00000027199	Gatm	glycine amidinotransferase	3.03583	6.06986e-31	Cytoplasm	enzyme	1
ENSMUSG00000027200	Sema6d	semaphorin 6D	4.49633	0.000627273	Plasma Membrane	other	11
ENSMUSG00000027224	Duoxa1	dual oxidase maturation factor 1	5.90137	0.00994024	Plasma Membrane	other	1
ENSMUSG00000043099	Hic1	HIC ZBTB transcriptional repressor 1	5.2329	1.14281e-05	Nucleus	transcription regulator	3
ENSMUSG00000027253	Lrp4	LDL receptor related protein 4	2.54459	4.97065e-07	Extracellular Space	other	19
ENSMUSG00000024486	Hbegf	heparin binding EGF like growth factor	3.74515	1.29812e-05	Extracellular Space	growth factor	6
ENSMUSG00000027314	Dll4	delta like canonical Notch ligand 4	6.33277	0.0119431	Extracellular Space	other	16
ENSMUSG00000027315	Spint1	serine peptidase inhibitor, Kunitz type 1	5.94797	2.00296e-63	Extracellular Space	other	3
ENSMUSG00000027347	Rasgrp1	RAS guanyl releasing protein 1	1.31539	2.07824e-06	Cytoplasm	other	5
ENSMUSG00000027351	Spred1	sprouty related EVH1 domain containing 1	1.85714	1.49109e-07	Plasma Membrane	other	10
ENSMUSG00000027360	Hdc	histidine decarboxylase	1.29884	0.00489651	Cytoplasm	enzyme	3
ENSMUSG00000027378	Nphp1	nephrocystin 1	4.62316	0.000504288	Nucleus	other	12
ENSMUSG00000027394	Ttl	tubulin tyrosine ligase	1.24945	0.0428025	Cytoplasm	enzyme	6
ENSMUSG00000034394	Lif	LIF, interleukin 6 family cytokine	4.01227	1.76546e-07	Extracellular Space	cytokine	10
ENSMUSG00000029379	Cxcl3	chemokine (C-X-C motif) ligand 3	6.05315	4.94533e-07	Extracellular Space	cytokine	2
ENSMUSG00000027488	Snta1	syntrophin alpha 1	1.11463	0.00832204	Plasma Membrane	other	4
ENSMUSG00000027496	Aurka	aurora kinase A	1.96243	6.77297e-07	Nucleus	kinase	4
ENSMUSG00000027533	Fabp5	fatty acid binding protein 5	1.61331	5.94897e-15	Cytoplasm	transporter	4
ENSMUSG00000027562	Car2	carbonic anhydrase 2	-1.93131	1.1467e-09	Cytoplasm	enzyme	3
ENSMUSG00000027624	Epb41l1	erythrocyte membrane protein band 4.1 like 1	2.14789	0.00801134	Plasma Membrane	other	4
ENSMUSG00000028034	Fubp1	far upstream element binding protein 1	1.11562	1.40426e-05	Nucleus	transcription regulator	1
ENSMUSG00000027699	Ect2	epithelial cell transforming 2	3.15826	2.06626e-05	Cytoplasm	other	14
ENSMUSG00000027737	Slc7a11	solute carrier family 7 member 11	1.32772	0.00089669	Plasma Membrane	transporter	9
ENSMUSG00000027765	P2ry1	purinergic receptor P2Y1	-1.06579	0.0478729	Plasma Membrane	G-protein coupled receptor	8
ENSMUSG00000027858	Tspan2	tetraspanin 2	-1.147	0.0294457	Extracellular Space	other	2
ENSMUSG00000062300	Nectin2	nectin cell adhesion molecule 2	3.00798	4.87558e-06	Plasma Membrane	transmembrane receptor	3
ENSMUSG00000018160	Med1	mediator complex subunit 1	1.00484	2.06626e-05	Nucleus	transcription regulator	2
ENSMUSG00000027993	Trim2	tripartite motif containing 2	6.79243	3.29905e-05	Cytoplasm	enzyme	3
ENSMUSG00000026069	Il1rl1	interleukin 1 receptor like 1	3.85677	6.81252e-06	Plasma Membrane	transmembrane receptor	6
ENSMUSG00000001419	Mef2d	myocyte enhancer factor 2D	1.4277	2.16774e-05	Nucleus	transcription regulator	6
ENSMUSG00000026313	Hdac4	histone deacetylase 4	1.12405	2.67895e-05	Nucleus	transcription regulator	12
ENSMUSG00000028063	Lmna	lamin A/C	1.62965	1.01388e-06	Nucleus	other	1
ENSMUSG00000028068	Iqgap3	IQ motif containing GTPase activating protein 3	6.0826	2.06202e-11	Plasma Membrane	other	2
ENSMUSG00000028073	Pear1	platelet endothelial aggregation receptor 1	1.87532	0.0019432	Plasma Membrane	other	3
ENSMUSG00000028111	Ctsk	cathepsin K	9.56637	4.13413e-05	Cytoplasm	peptidase	4
ENSMUSG00000015314	Slamf6	SLAM family member 6	1.74946	6.97327e-06	Plasma Membrane	transmembrane receptor	1
ENSMUSG00000028184	Adgrl2	adhesion G protein-coupled receptor L2	3.44112	2.87908e-11	Plasma Membrane	G-protein coupled receptor	3
ENSMUSG00000028195	Cyr61	cysteine rich angiogenic inducer 61	10.3306	1.51838e-08	Extracellular Space	other	10
ENSMUSG00000028217	Cdh17	cadherin 17	5.91408	0.0105841	Plasma Membrane	transporter	9
ENSMUSG00000028245	Nsmaf	neutral sphingomyelinase activation associated factor	1.14784	1.54071e-06	Cytoplasm	other	1
ENSMUSG00000073563	Csnk1g3	casein kinase 1 gamma 3	1.57355	0.000123169	Cytoplasm	kinase	5
ENSMUSG00000028291	Akirin2	akirin 2	1.83919	5.07644e-08	Nucleus	other	2
ENSMUSG00000028341	Nr4a3	nuclear receptor subfamily 4 group A member 3	4.4874	0.00220009	Nucleus	ligand-dependent nuclear receptor	19
ENSMUSG00000034855	Cxcl10	C-X-C motif chemokine ligand 10	1.43533	2.52362e-06	Extracellular Space	cytokine	5
ENSMUSG00000028402	Mpdz	multiple PDZ domain crumbs cell polarity complex component	6.29938	0.0134549	Plasma Membrane	other	5
ENSMUSG00000028413	B4galt1	beta-1,4-galactosyltransferase 1	1.36623	3.24252e-07	Cytoplasm	enzyme	6
ENSMUSG00000028435	Aqp3	aquaporin 3 (Gill blood group)	5.53704	0.0281368	Plasma Membrane	transporter	1
ENSMUSG00000028476	Reck	reversion inducing cysteine rich protein with kazal motifs	3.74596	0.000908981	Plasma Membrane	other	10
ENSMUSG00000028525	Pde4b	phosphodiesterase 4B	1.52587	2.64415e-05	Cytoplasm	enzyme	7
ENSMUSG00000028546	Elavl4	ELAV like RNA binding protein 4	6.34266	0.0028765	Cytoplasm	translation regulator	7
ENSMUSG00000028583	Pdpn	podoplanin	7.69484	2.52826e-10	Plasma Membrane	other	8
ENSMUSG00000026321	Tnfrsf11a	TNF receptor superfamily member 11a	1.79266	1.54329e-05	Plasma Membrane	transmembrane receptor	4
ENSMUSG00000056962	Jmjd6	arginine demethylase and lysine hydroxylase	1.21361	2.04618e-05	Plasma Membrane	transmembrane receptor	2
ENSMUSG00000017861	Mybl2	MYB proto-oncogene like 2	4.96215	3.19443e-05	Nucleus	transcription regulator	3
ENSMUSG00000028655	Mfsd2a	major facilitator superfamily domain containing 2A	6.16407	0.0176801	Plasma Membrane	transporter	1
ENSMUSG00000028656	Cap1	cyclase associated actin cytoskeleton regulatory protein 1	-2.09518	0.0408347	Plasma Membrane	other	1
ENSMUSG00000028677	Rnf220	ring finger protein 220	1.57923	4.70847e-10	Cytoplasm	enzyme	5
ENSMUSG00000028678	Kif2c	kinesin family member 2C	7.30876	3.93941e-09	Nucleus	other	1
ENSMUSG00000028680	Plk3	polo like kinase 3	6.24342	1.89076e-76	Nucleus	kinase	1
ENSMUSG00000028718	Stil	STIL, centriolar assembly protein	3.15426	0.011467	Nucleus	other	2
ENSMUSG00000028782	Adgrb2	adhesion G protein-coupled receptor B2	4.51326	0.0154583	Plasma Membrane	G-protein coupled receptor	5
ENSMUSG00000028832	Stmn1	stathmin 1	3.25025	1.55039e-25	Cytoplasm	other	5
ENSMUSG00000028868	Wasf2	WAS protein family member 2	-1.08192	0.00759193	Plasma Membrane	other	7
ENSMUSG00000028871	Rspo1	R-spondin 1	-1.34274	0.000155287	Plasma Membrane	other	7
ENSMUSG00000028906	Epb41	erythrocyte membrane protein band 4.1	-1.3121	1.87765e-10	Plasma Membrane	other	4
ENSMUSG00000028926	Cdk14	cyclin dependent kinase 14	1.21973	0.000104534	Nucleus	kinase	5
ENSMUSG00000028931	Kcnab2	potassium voltage-gated channel subfamily A regulatory beta subunit 2	-1.27835	0.00106527	Plasma Membrane	ion channel	4
ENSMUSG00000026770	Il2ra	interleukin 2 receptor subunit alpha	5.683	2.08959e-05	Plasma Membrane	transmembrane receptor	3
ENSMUSG00000028967	Errfi1	ERBB receptor feedback inhibitor 1	2.79699	1.27262e-29	Cytoplasm	other	4
ENSMUSG00000029005	Draxin	dorsal inhibitory axon guidance protein	-7.64636	2.74296e-06	Extracellular Space	other	17
ENSMUSG00000020125	Elane	elastase, neutrophil expressed	4.56149	0.000996272	Extracellular Space	peptidase	7
ENSMUSG00000015316	Slamf1	signaling lymphocytic activation molecule family member 1	-2.17656	2.83717e-05	Plasma Membrane	transmembrane receptor	4
ENSMUSG00000029084	Cd38	CD38 molecule	2.06561	1.79107e-05	Plasma Membrane	enzyme	5
ENSMUSG00000022225	Cma1	chymase 1	1.75746	0.00118837	Extracellular Space	peptidase	6
ENSMUSG00000029177	Cenpa	centromere protein A	2.23462	2.8891e-13	Nucleus	other	1
ENSMUSG00000029204	Rhoh	ras homolog family member H	1.18517	0.000310858	Plasma Membrane	enzyme	3
ENSMUSG00000029207	Apbb2	amyloid beta precursor protein binding family B member 2	5.28027	2.07836e-15	Cytoplasm	other	5
ENSMUSG00000020184	Mdm2	MDM2 proto-oncogene	1.13558	3.58612e-05	Nucleus	transcription regulator	12
ENSMUSG00000029291	Rufy3	RUN and FYVE domain containing 3	1.64563	3.75575e-09	Plasma Membrane	other	10
ENSMUSG00000033721	Vav3	vav guanine nucleotide exchange factor 3	1.22221	3.86806e-06	Extracellular Space	cytokine	6
ENSMUSG00000029309	Sparcl1	SPARC like 1	6.76347	0.000894428	Extracellular Space	other	7
ENSMUSG00000004296	Il12b	interleukin 12B	7.54726	4.97495e-06	Extracellular Space	cytokine	6
ENSMUSG00000031465	Angpt2	angiopoietin 2	4.93447	0.000385837	Extracellular Space	growth factor	12
ENSMUSG00000031780	Ccl17	C-C motif chemokine ligand 17	5.12723	7.07436e-06	Extracellular Space	cytokine	2
ENSMUSG00000029392	Rilpl1	Rab interacting lysosomal protein like 1	2.08558	0.000431042	Cytoplasm	other	2
ENSMUSG00000040663	Clcf1	cardiotrophin like cytokine factor 1	2.57766	9.37543e-06	Extracellular Space	cytokine	7
ENSMUSG00000029467	Atp2a2	ATPase sarcoplasmic/endoplasmic reticulum Ca2+ transporting 2	1.44645	6.15369e-07	Cytoplasm	transporter	3
ENSMUSG00000021559	Dapk1	death associated protein kinase 1	1.3378	0.000132124	Cytoplasm	kinase	1
ENSMUSG00000029518	Rab35	RAB35, member RAS oncogene family	-1.07481	0.0444592	Cytoplasm	enzyme	1
ENSMUSG00000029552	Tes	testin LIM domain protein	1.61917	2.26738e-12	Plasma Membrane	other	3
ENSMUSG00000029581	Fscn1	fascin actin-bundling protein 1	5.77682	0.0167894	Cytoplasm	other	11
ENSMUSG00000029614	Rpl6	ribosomal protein L6	-1.03385	6.2961e-05	Nucleus	other	4
ENSMUSG00000009569	Mkl2	myocardin related transcription factor B	1.36358	3.64419e-05	Nucleus	transcription regulator	2
ENSMUSG00000029718	Pcolce	procollagen C-endopeptidase enhancer	6.75516	0.000109579	Extracellular Space	other	1
ENSMUSG00000029761	Cald1	caldesmon 1	-2.26084	0.0104866	Plasma Membrane	other	6
ENSMUSG00000029790	Cep41	centrosomal protein 41	1.52189	0.0109254	Cytoplasm	other	1
ENSMUSG00000029816	Gpnmb	glycoprotein nmb	8.584	1.13536e-197	Plasma Membrane	enzyme	5
ENSMUSG00000029826	Zc3hav1	zinc finger CCCH-type containing, antiviral 1	1.09015	2.00566e-07	Plasma Membrane	other	1
ENSMUSG00000029838	Ptn	pleiotrophin	6.92736	0.000432495	Extracellular Space	growth factor	14
ENSMUSG00000029859	Epha1	EPH receptor A1	-2.99448	9.61101e-05	Plasma Membrane	kinase	4
ENSMUSG00000036169	Sostdc1	sclerostin domain containing 1	6.33376	0.00204621	Extracellular Space	growth factor	7
ENSMUSG00000030000	Add2	adducin 2	-5.85535	0.0159899	Cytoplasm	other	5
ENSMUSG00000030059	Tmf1	TATA element modulatory factor 1	2.1572	3.06556e-08	Cytoplasm	transcription regulator	1
ENSMUSG00000030064	Frmd4b	FERM domain containing 4B	1.37393	8.13968e-06	Cytoplasm	other	6
ENSMUSG00000034664	Itga2b	integrin subunit alpha 2b	-6.32799	4.13413e-05	Plasma Membrane	transmembrane receptor	6
ENSMUSG00000022228	Zscan26	zinc finger and SCAN domain containing 26	1.63927	3.73328e-05	Nucleus	transcription regulator	1
ENSMUSG00000030111	A2m	alpha-2-macroglobulin	5.85407	0.0210813	Extracellular Space	transporter	2
ENSMUSG00000030142	Clec4e	C-type lectin domain family 4 member E	1.1977	3.87415e-06	Plasma Membrane	other	4
ENSMUSG00000002033	Cd3g	CD3g molecule	1.90398	6.56649e-05	Plasma Membrane	transmembrane receptor	1
ENSMUSG00000030172	Erc1	ELKS/RAB6-interacting/CAST family member 1	2.51296	0.00236521	Cytoplasm	other	5
ENSMUSG00000030208	Emp1	epithelial membrane protein 1	3.65867	1.80849e-18	Plasma Membrane	other	1
ENSMUSG00000030223	Ptpro	protein tyrosine phosphatase, receptor type O	-1.21961	1.52637e-07	Plasma Membrane	phosphatase	21
ENSMUSG00000030231	Plekha5	pleckstrin homology domain containing A5	1.4967	0.00619806	Cytoplasm	other	4
ENSMUSG00000079056	Kcnip3	potassium voltage-gated channel interacting protein 3	2.17601	5.08203e-05	Nucleus	transcription regulator	3
ENSMUSG00000030265	Kras	KRAS proto-oncogene, GTPase	1.41142	3.45198e-12	Cytoplasm	enzyme	8
ENSMUSG00000026778	Prkcq	protein kinase C theta	1.26404	0.000139885	Cytoplasm	kinase	7
ENSMUSG00000030302	Atp2b2	ATPase plasma membrane Ca2+ transporting 2	5.75375	0.0181064	Plasma Membrane	transporter	8
ENSMUSG00000024670	Cd6	CD6 molecule	2.16482	7.56459e-05	Plasma Membrane	transmembrane receptor	1
ENSMUSG00000030342	Cd9	CD9 molecule	1.00059	0.000325009	Plasma Membrane	other	6
ENSMUSG00000030516	Tjp1	tight junction protein 1	4.76573	4.48043e-05	Plasma Membrane	other	8
ENSMUSG00000001288	Rarg	retinoic acid receptor gamma	-1.67831	0.00258135	Nucleus	ligand-dependent nuclear receptor	2
ENSMUSG00000030589	Rasgrp4	RAS guanyl releasing protein 4	-1.80361	7.61477e-08	Cytoplasm	other	1
ENSMUSG00000030671	Pde3b	phosphodiesterase 3B	3.01356	1.53724e-18	Cytoplasm	enzyme	2
ENSMUSG00000039473	Ubn1	ubinuclein 1	1.2972	6.94945e-05	Nucleus	transcription regulator	4
ENSMUSG00000030708	Dnajb13	DnaJ heat shock protein family (Hsp40) member B13	-1.44855	0.00282821	Cytoplasm	other	1
ENSMUSG00000030742	Lat	linker for activation of T cells	1.31538	0.0160085	Plasma Membrane	other	3
ENSMUSG00000030744	Rps3	ribosomal protein S3	-1.07287	8.08027e-06	Cytoplasm	enzyme	6
ENSMUSG00000026070	Il18r1	interleukin 18 receptor 1	2.53006	7.89244e-05	Plasma Membrane	transmembrane receptor	2
ENSMUSG00000030770	Parva	parvin alpha	6.93632	0.000175587	Cytoplasm	other	7
ENSMUSG00000018930	Ccl4	C-C motif chemokine ligand 4	3.53626	1.69541e-05	Extracellular Space	cytokine	4
ENSMUSG00000046223	Plaur	plasminogen activator, urokinase receptor	1.16719	0.00011013	Plasma Membrane	transmembrane receptor	2
ENSMUSG00000030852	Tacc2	transforming acidic coiled-coil containing protein 2	2.84442	0.00942562	Nucleus	other	1
ENSMUSG00000030867	Plk1	polo like kinase 1	4.83795	1.30962e-16	Nucleus	kinase	1
ENSMUSG00000031016	Wee1	WEE1 G2 checkpoint kinase	1.56503	0.0381641	Nucleus	kinase	1
ENSMUSG00000031078	Cttn	cortactin	1.98929	0.0327484	Plasma Membrane	other	20
ENSMUSG00000002799	Jag2	jagged 2	5.06259	0.00220266	Extracellular Space	growth factor	3
ENSMUSG00000031142	Cacna1f	calcium voltage-gated channel subunit alpha1 F	-1.18766	0.0205014	Plasma Membrane	ion channel	4
ENSMUSG00000018983	E2f2	E2F transcription factor 2	-1.29753	0.000146339	Nucleus	transcription regulator	4
ENSMUSG00000031214	Ophn1	oligophrenin 1	1.72167	1.74373e-09	Cytoplasm	other	12
ENSMUSG00000031266	Gla	galactosidase alpha	2.05178	2.20458e-12	Cytoplasm	enzyme	3
ENSMUSG00000031367	Ap1s2	adaptor related protein complex 1 subunit sigma 2	-1.30529	2.40574e-13	Cytoplasm	transporter	1
ENSMUSG00000031443	F7	coagulation factor VII	2.01835	2.29225e-05	Plasma Membrane	peptidase	1
ENSMUSG00000019966	Kitl	KIT ligand	6.03708	0.00583752	Extracellular Space	growth factor	3
ENSMUSG00000041324	Inhba	inhibin subunit beta A	3.15621	0.00629231	Extracellular Space	growth factor	3
ENSMUSG00000031495	Cd209d	CD209d antigen	2.60033	5.9098e-07	Plasma Membrane	other	4
ENSMUSG00000016529	Il10	interleukin 10	6.63899	3.16761e-05	Extracellular Space	cytokine	30
ENSMUSG00000031502	Col4a1	collagen type IV alpha 1 chain	2.01631	0.0055108	Extracellular Space	other	7
ENSMUSG00000031503	Col4a2	collagen type IV alpha 2 chain	2.22302	0.0126031	Extracellular Space	other	9
ENSMUSG00000031504	Rab20	RAB20, member RAS oncogene family	3.10752	4.12752e-32	Cytoplasm	enzyme	1
ENSMUSG00000031517	Gpm6a	glycoprotein M6A	6.37078	0.00219966	Plasma Membrane	ion channel	7
ENSMUSG00000031555	Adam9	ADAM metallopeptidase domain 9	1.17569	1.40888e-05	Plasma Membrane	peptidase	7
ENSMUSG00000031565	Fgfr1	fibroblast growth factor receptor 1	2.44088	0.00049764	Plasma Membrane	kinase	18
ENSMUSG00000031596	Slc7a2	solute carrier family 7 member 2	3.53504	0.0349029	Plasma Membrane	transporter	3
ENSMUSG00000031616	Ednra	endothelin receptor type A	7.06724	0.0001193	Plasma Membrane	transmembrane receptor	6
ENSMUSG00000023034	Nr4a1	nuclear receptor subfamily 4 group A member 1	2.56671	0.00383433	Nucleus	ligand-dependent nuclear receptor	7
ENSMUSG00000005672	Kit	KIT proto-oncogene receptor tyrosine kinase	5.57408	0.000189246	Plasma Membrane	transmembrane receptor	10
ENSMUSG00000044167	Foxo1	forkhead box O1	1.11801	0.000246201	Nucleus	transcription regulator	5
ENSMUSG00000030272	Camk1	calcium/calmodulin dependent protein kinase I	1.00645	0.000182202	Cytoplasm	kinase	14
ENSMUSG00000029061	Mmp23	matrix metallopeptidase 23B	5.88704	0.00865013	Extracellular Space	peptidase	1
ENSMUSG00000006205	Htra1	HtrA serine peptidase 1	2.77825	0.0163007	Extracellular Space	peptidase	10
ENSMUSG00000031760	Mt3	metallothionein 3	5.89339	0.00849701	Cytoplasm	other	5
ENSMUSG00000031765	Mt1	metallothionein 1	2.00702	4.35165e-09	Cytoplasm	other	5
ENSMUSG00000029372	Ppbp	pro-platelet basic protein	-6.44813	0.000177758	Other	cytokine	2
ENSMUSG00000060183	Cxcl11	chemokine (C-X-C motif) ligand 11	6.79872	0.000241032	Extracellular Space	cytokine	2
ENSMUSG00000041012	Cmtm8	CKLF like MARVEL transmembrane domain containing 8	2.89404	0.000323959	Extracellular Space	cytokine	2
ENSMUSG00000031785	Adgrg1	adhesion G protein-coupled receptor G1	1.7918	6.04468e-05	Plasma Membrane	G-protein coupled receptor	8
ENSMUSG00000042182	Bend6	BEN domain containing 6	3.04791	0.000278724	Nucleus	transcription regulator	3
ENSMUSG00000031955	Bcar1	BCAR1, Cas family scaffold protein	5.53625	0.0363328	Plasma Membrane	enzyme	11
ENSMUSG00000031960	Aars	alanyl-tRNA synthetase	1.3472	1.41893e-06	Cytoplasm	enzyme	5
ENSMUSG00000031990	Jam3	junctional adhesion molecule 3	6.07264	0.00470822	Plasma Membrane	other	7
ENSMUSG00000025408	Ddit3	DNA damage inducible transcript 3	1.2698	0.00036574	Nucleus	transcription regulator	9
ENSMUSG00000032076	Cadm1	cell adhesion molecule 1	9.91104	4.34743e-14	Plasma Membrane	other	11
ENSMUSG00000032087	Dscaml1	DS cell adhesion molecule like 1	6.18778	0.00872656	Plasma Membrane	other	2
ENSMUSG00000036478	Btg1	BTG anti-proliferation factor 1	1.03065	0.000381753	Nucleus	transcription regulator	6
ENSMUSG00000032216	Nedd4	neural precursor cell expressed, developmentally down-regulated 4	2.17077	0.000220808	Cytoplasm	enzyme	11
ENSMUSG00000032220	Myo1e	myosin IE	4.07049	7.49828e-42	Cytoplasm	enzyme	6
ENSMUSG00000032232	Cgnl1	cingulin like 1	4.39138	5.07599e-21	Plasma Membrane	other	4
ENSMUSG00000032245	Cln6	CLN6, transmembrane ER protein	-1.06623	3.50683e-06	Cytoplasm	other	1
ENSMUSG00000032264	Zw10	zw10 kinetochore protein	1.04785	0.0332384	Nucleus	other	1
ENSMUSG00000032327	Stra6	stimulated by retinoic acid 6	6.12314	0.00388207	Plasma Membrane	transporter	1
ENSMUSG00000032350	Gclc	glutamate-cysteine ligase catalytic subunit	2.76247	1.63681e-17	Cytoplasm	enzyme	8
ENSMUSG00000032369	Plscr1	phospholipid scramblase 1	1.5165	4.87944e-06	Plasma Membrane	enzyme	2
ENSMUSG00000032374	Plod2	procollagen-lysine,2-oxoglutarate 5-dioxygenase 2	4.4746	0.00316263	Cytoplasm	enzyme	3
ENSMUSG00000032375	Aph1b	aph-1 homolog B, gamma-secretase subunit	-1.83614	3.56358e-07	Cytoplasm	peptidase	1
ENSMUSG00000032413	Rasa2	RAS p21 protein activator 2	1.40987	7.30652e-06	Cytoplasm	other	1
ENSMUSG00000027230	Creb3l1	cAMP responsive element binding protein 3 like 1	1.54214	0.000383391	Nucleus	transcription regulator	10
ENSMUSG00000032487	Ptgs2	prostaglandin-endoperoxide synthase 2	6.9615	1.00429e-99	Cytoplasm	enzyme	25
ENSMUSG00000052889	Prkcb	protein kinase C beta	1.2711	0.00023338	Cytoplasm	kinase	6
ENSMUSG00000036867	Smad6	SMAD family member 6	2.24448	0.000401151	Nucleus	transcription regulator	10
ENSMUSG00000032518	Rpsa	ribosomal protein SA	-1.53123	1.64844e-06	Cytoplasm	translation regulator	4
ENSMUSG00000032531	Amotl2	angiomotin like 2	-1.37891	0.0414553	Plasma Membrane	other	7
ENSMUSG00000032547	Ryk	receptor-like tyrosine kinase	4.29542	0.0483873	Plasma Membrane	kinase	11
ENSMUSG00000032549	Rab6b	RAB6B, member RAS oncogene family	1.35201	0.0395284	Cytoplasm	enzyme	1
ENSMUSG00000025402	Nab2	NGFI-A binding protein 2	1.42319	0.000412162	Nucleus	transcription regulator	1
ENSMUSG00000032725	Folr2	folate receptor beta	5.51081	0.000901326	Plasma Membrane	transporter	1
ENSMUSG00000032827	Ppp1r9a	protein phosphatase 1 regulatory subunit 9A	2.38581	0.00678191	Plasma Membrane	other	24
ENSMUSG00000032846	Zswim6	zinc finger SWIM-type containing 6	-1.36838	0.001073	Extracellular Space	other	5
ENSMUSG00000032860	P2ry2	purinergic receptor P2Y2	2.41932	9.04256e-08	Plasma Membrane	G-protein coupled receptor	11
ENSMUSG00000032911	Cspg4	chondroitin sulfate proteoglycan 4	8.89163	6.21082e-10	Plasma Membrane	other	5
ENSMUSG00000033149	Phldb2	pleckstrin homology like domain family B member 2	7.23239	0.000137316	Cytoplasm	other	12
ENSMUSG00000033174	Mgll	monoglyceride lipase	2.81145	0.00192795	Plasma Membrane	enzyme	9
ENSMUSG00000033191	Tie1	tyrosine kinase with immunoglobulin like and EGF like domains 1	-6.23514	0.0180006	Plasma Membrane	kinase	3
ENSMUSG00000033278	Ptprm	protein tyrosine phosphatase, receptor type M	7.29544	1.96493e-06	Plasma Membrane	phosphatase	13
ENSMUSG00000033287	Kctd17	potassium channel tetramerization domain containing 17	-1.44881	0.017618	Cytoplasm	other	3
ENSMUSG00000033323	Ctdp1	CTD phosphatase subunit 1	2.4395	2.85768e-22	Nucleus	phosphatase	1
ENSMUSG00000033444	Specc1l	sperm antigen with calponin homology and coiled-coil domains 1 like	1.21381	0.000306407	Extracellular Space	other	1
ENSMUSG00000033538	Casp4	caspase 4	-1.06913	5.36816e-06	Cytoplasm	peptidase	5
ENSMUSG00000055170	Ifng	interferon gamma	2.60639	0.000331575	Extracellular Space	cytokine	15
ENSMUSG00000033739	Fkbpl	FK506 binding protein like	-2.41108	1.3868e-12	Nucleus	other	2
ENSMUSG00000033985	Tesk2	testis associated actin remodelling kinase 2	-1.35903	0.000859947	Nucleus	kinase	6
ENSMUSG00000034101	Ctnnd1	catenin delta 1	-1.52052	0.00284715	Nucleus	other	21
ENSMUSG00000034164	Emid1	EMI domain containing 1	1.9483	0.000341219	Extracellular Space	other	2
ENSMUSG00000034177	Rnf43	ring finger protein 43	3.27327	0.00186602	Plasma Membrane	enzyme	3
ENSMUSG00000079164	Tlr5	toll like receptor 5	1.27684	0.000326339	Plasma Membrane	transmembrane receptor	8
ENSMUSG00000034226	Rhov	ras homolog family member V	5.36427	1.28425e-46	Plasma Membrane	enzyme	3
ENSMUSG00000025746	Il6	interleukin 6	2.8434	0.00034645	Extracellular Space	cytokine	23
ENSMUSG00000034412	Tbc1d10a	TBC1 domain family member 10A	1.39088	2.3816e-09	Plasma Membrane	other	1
ENSMUSG00000034424	Gcsh	glycine cleavage system protein H	1.47118	1.42187e-06	Cytoplasm	enzyme	2
ENSMUSG00000034485	Uaca	uveal autoantigen with coiled-coil domains and ankyrin repeats	6.19894	0.0181064	Cytoplasm	other	1
ENSMUSG00000034612	Chst11	carbohydrate sulfotransferase 11	2.77467	0.000292927	Cytoplasm	enzyme	6
ENSMUSG00000034640	Tiparp	TCDD inducible poly(ADP-ribose) polymerase	2.08144	5.09979e-08	Nucleus	enzyme	2
ENSMUSG00000034220	Gpc1	glypican 1	1.52999	0.000374616	Plasma Membrane	transmembrane receptor	8
ENSMUSG00000034675	Dbn1	drebrin 1	6.66551	5.94271e-10	Cytoplasm	other	31
ENSMUSG00000034765	Dusp5	dual specificity phosphatase 5	2.74825	0.00677925	Nucleus	phosphatase	3
ENSMUSG00000034786	Gpsm3	G protein signaling modulator 3	-1.70523	0.000495997	Cytoplasm	other	1
ENSMUSG00000000817	Fasl	Fas ligand	1.57106	0.000598113	Extracellular Space	cytokine	12
ENSMUSG00000034926	Dhcr24	24-dehydrocholesterol reductase	-2.34546	3.92002e-06	Cytoplasm	enzyme	1
ENSMUSG00000025855	Prkar1b	protein kinase cAMP-dependent type I regulatory subunit beta	2.03466	0.000491168	Cytoplasm	kinase	2
ENSMUSG00000034987	Hrh2	histamine receptor H2	1.62847	4.73247e-06	Plasma Membrane	G-protein coupled receptor	4
ENSMUSG00000035000	Dpp4	dipeptidyl peptidase 4	1.45002	5.76078e-06	Plasma Membrane	peptidase	5
ENSMUSG00000014599	Csf1	colony stimulating factor 1	2.10554	0.00084162	Extracellular Space	cytokine	3
ENSMUSG00000000127	Fer	FER tyrosine kinase	1.85106	0.000584896	Cytoplasm	kinase	6
ENSMUSG00000035105	Egln3	egl-9 family hypoxia inducible factor 3	1.96834	3.11036e-05	Cytoplasm	enzyme	3
ENSMUSG00000035199	Arl6ip5	ADP ribosylation factor like GTPase 6 interacting protein 5	-1.16624	2.06915e-06	Cytoplasm	other	2
ENSMUSG00000035314	Gdpd5	glycerophosphodiester phosphodiesterase domain containing 5	1.67427	0.00221092	Plasma Membrane	enzyme	4
ENSMUSG00000060034	Ctf2	cardiotrophin 2	-2.2784	0.000918512	Extracellular Space	cytokine	2
ENSMUSG00000001741	Il16	interleukin 16	-1.01793	0.0013675	Extracellular Space	cytokine	3
ENSMUSG00000035042	Ccl5	C-C motif chemokine ligand 5	1.31501	0.00146934	Extracellular Space	cytokine	17
ENSMUSG00000035678	Tnfsf9	tumor necrosis factor (ligand) superfamily, member 9	3.6492	1.89543e-35	Plasma Membrane	other	3
ENSMUSG00000035722	Abca7	ATP binding cassette subfamily A member 7	-1.08096	0.0002572	Plasma Membrane	transporter	3
ENSMUSG00000035764	Fbxo45	F-box protein 45	2.42235	0.000158307	Plasma Membrane	other	9
ENSMUSG00000035783	Acta2	actin, alpha 2, smooth muscle, aorta	-1.39946	0.00312241	Cytoplasm	other	3
ENSMUSG00000035863	Palm	paralemmin	-1.56524	8.42653e-05	Plasma Membrane	other	16
ENSMUSG00000015619	Gata3	GATA binding protein 3	2.00144	0.000468061	Nucleus	transcription regulator	26
ENSMUSG00000035900	Gramd4	GRAM domain containing 4	1.36151	1.52525e-08	Cytoplasm	other	1
ENSMUSG00000035914	Cd276	CD276 molecule	2.90419	4.05774e-07	Plasma Membrane	other	4
ENSMUSG00000035960	Apex1	apurinic/apyrimidinic endodeoxyribonuclease 1	1.11989	0.0117914	Nucleus	enzyme	2
ENSMUSG00000036158	Prickle1	prickle planar cell polarity protein 1	4.76119	0.0104543	Nucleus	other	6
ENSMUSG00000021253	Tgfb3	transforming growth factor beta 3	3.23366	0.00993074	Extracellular Space	growth factor	29
ENSMUSG00000036256	Igfbp7	insulin like growth factor binding protein 7	4.85691	0.0013675	Extracellular Space	transporter	4
ENSMUSG00000036295	Lrrn3	leucine rich repeat neuronal 3	-7.48874	5.53041e-07	Extracellular Space	other	4
ENSMUSG00000001280	Sp1	Sp1 transcription factor	-1.10493	0.000520542	Nucleus	transcription regulator	13
ENSMUSG00000036353	P2ry12	purinergic receptor P2Y12	3.48781	1.72798e-20	Plasma Membrane	G-protein coupled receptor	6
ENSMUSG00000036356	Csgalnact1	chondroitin sulfate N-acetylgalactosaminyltransferase 1	-7.95603	6.10178e-07	Cytoplasm	enzyme	2
ENSMUSG00000055148	Klf2	Kruppel like factor 2	-1.45106	0.000593505	Nucleus	transcription regulator	7
ENSMUSG00000022682	Rrn3	RRN3 homolog, RNA polymerase I transcription factor	1.13203	0.000651281	Nucleus	transcription regulator	3
ENSMUSG00000037251	Pomk	protein-O-mannose kinase	-1.06062	0.000850372	Cytoplasm	kinase	2
ENSMUSG00000036533	Cdc42ep3	CDC42 effector protein 3	-1.04949	9.2943e-08	Cytoplasm	other	5
ENSMUSG00000036570	Fxyd1	FXYD domain containing ion transport regulator 1	3.7764	0.0397848	Plasma Membrane	ion channel	1
ENSMUSG00000036580	Spg20	spastic paraplegia 20, spartin (Troyer syndrome) homolog (human)	1.05282	0.00352629	Plasma Membrane	other	6
ENSMUSG00000060275	Nrg2	neuregulin 2	3.68859	0.012371	Extracellular Space	growth factor	6
ENSMUSG00000036634	Mag	myelin associated glycoprotein	2.49151	0.00106907	Plasma Membrane	other	16
ENSMUSG00000028602	Tnfrsf8	TNF receptor superfamily member 8	-1.75582	0.000473889	Plasma Membrane	transmembrane receptor	1
ENSMUSG00000036777	Anln	anillin actin binding protein	1.53109	0.0135386	Cytoplasm	other	3
ENSMUSG00000036825	Ssx2ip	SSX family member 2 interacting protein	2.66998	1.47286e-16	Plasma Membrane	other	4
ENSMUSG00000036832	Lpar3	lysophosphatidic acid receptor 3	5.9953	0.00843718	Plasma Membrane	G-protein coupled receptor	9
ENSMUSG00000036853	Mcoln3	mucolipin 3	3.38316	4.88406e-05	Plasma Membrane	ion channel	1
ENSMUSG00000029687	Ezh2	enhancer of zeste 2 polycomb repressive complex 2 subunit	1.41658	0.000736451	Nucleus	transcription regulator	6
ENSMUSG00000036940	Kdm1a	lysine demethylase 1A	2.57152	6.45214e-19	Nucleus	enzyme	6
ENSMUSG00000036995	Asap3	ArfGAP with SH3 domain, ankyrin repeat and PH domain 3	4.51122	0.000156368	Plasma Membrane	other	3
ENSMUSG00000037075	Rnf139	ring finger protein 139	1.00161	0.000467322	Cytoplasm	enzyme	1
ENSMUSG00000037211	Spry1	sprouty RTK signaling antagonist 1	3.62975	1.0619e-05	Cytoplasm	other	4
ENSMUSG00000037242	Clic4	chloride intracellular channel 4	1.87579	1.3456e-12	Plasma Membrane	ion channel	4
ENSMUSG00000029516	Cit	citron rho-interacting serine/threonine kinase	2.89491	0.000909105	Cytoplasm	kinase	5
ENSMUSG00000037313	Tacc3	transforming acidic coiled-coil containing protein 3	1.61533	4.30569e-07	Nucleus	other	1
ENSMUSG00000037325	Bbs7	Bardet-Biedl syndrome 7	1.88954	0.0328285	Cytoplasm	other	2
ENSMUSG00000037370	Enpp1	ectonucleotide pyrophosphatase/phosphodiesterase 1	3.58114	2.17812e-27	Plasma Membrane	enzyme	1
ENSMUSG00000037411	Serpine1	serpin family E member 1	5.52758	0.00685358	Extracellular Space	other	17
ENSMUSG00000022263	Trio	trio Rho guanine nucleotide exchange factor	-1.39673	0.000913975	Cytoplasm	kinase	3
ENSMUSG00000037519	Ppfia1	PTPRF interacting protein alpha 1	1.83163	2.24193e-08	Plasma Membrane	phosphatase	3
ENSMUSG00000037706	Cd81	CD81 molecule	3.71097	4.08015e-32	Plasma Membrane	other	1
ENSMUSG00000037754	Ppp1r16b	protein phosphatase 1 regulatory subunit 16B	3.24962	7.29063e-15	Plasma Membrane	phosphatase	12
ENSMUSG00000037805	Rpl10a	ribosomal protein L10a	-1.34991	2.96595e-05	Nucleus	other	4
ENSMUSG00000037820	Tgm2	transglutaminase 2	5.05321	4.8744e-141	Cytoplasm	enzyme	8
ENSMUSG00000037852	Cpe	carboxypeptidase E	8.51373	4.35949e-09	Cytoplasm	peptidase	2
ENSMUSG00000024642	Tle4	transducin like enhancer of split 4	1.32322	0.000962694	Nucleus	transcription regulator	5
ENSMUSG00000037940	Inpp4b	inositol polyphosphate-4-phosphatase type II B	1.35712	0.0332236	Cytoplasm	phosphatase	2
ENSMUSG00000037944	Ccr7	C-C motif chemokine receptor 7	4.13592	4.84677e-47	Plasma Membrane	G-protein coupled receptor	9
ENSMUSG00000058756	Thra	thyroid hormone receptor alpha	-1.80769	0.00716108	Nucleus	ligand-dependent nuclear receptor	6
ENSMUSG00000037995	Igsf9	immunoglobulin superfamily member 9	1.93148	0.0226142	Plasma Membrane	other	4
ENSMUSG00000038007	Acer2	alkaline ceramidase 2	-3.54815	0.00166425	Cytoplasm	enzyme	1
ENSMUSG00000038156	Spon1	spondin 1	1.90442	1.05478e-10	Extracellular Space	other	3
ENSMUSG00000038168	P3h2	prolyl 3-hydroxylase 2	8.95323	2.49072e-09	Cytoplasm	enzyme	4
ENSMUSG00000038235	F11r	F11 receptor	1.47417	2.36976e-05	Plasma Membrane	other	7
ENSMUSG00000038260	Trpm4	transient receptor potential cation channel subfamily M member 4	1.14476	0.024071	Plasma Membrane	ion channel	9
ENSMUSG00000038357	Camp	cathelicidin antimicrobial peptide	4.63938	0.0406561	Cytoplasm	other	4
ENSMUSG00000038387	Rras	RAS related	-1.78644	2.59029e-13	Cytoplasm	enzyme	4
ENSMUSG00000038393	Txnip	thioredoxin interacting protein	-1.96941	1.64301e-11	Cytoplasm	other	1
ENSMUSG00000038400	Pmepa1	prostate transmembrane protein, androgen induced 1	8.65031	5.31275e-12	Plasma Membrane	other	6
ENSMUSG00000032446	Eomes	eomesodermin	1.76026	0.000977451	Nucleus	transcription regulator	1
ENSMUSG00000038459	Abhd17c	abhydrolase domain containing 17C	2.88581	5.57293e-10	Plasma Membrane	enzyme	8
ENSMUSG00000038463	Olfml2b	olfactomedin like 2B	3.79192	2.37347e-09	Extracellular Space	other	4
ENSMUSG00000038467	Chmp4b	charged multivesicular body protein 4B	-1.10418	0.0318933	Cytoplasm	other	10
ENSMUSG00000038486	Sv2a	synaptic vesicle glycoprotein 2A	5.69471	0.0246666	Cytoplasm	transporter	2
ENSMUSG00000019997	Ctgf	connective tissue growth factor	6.12095	0.0200512	Extracellular Space	growth factor	11
ENSMUSG00000029275	Gfi1	growth factor independent 1 transcriptional repressor	3.47602	0.00103346	Nucleus	transcription regulator	1
ENSMUSG00000038612	Mcl1	MCL1, BCL2 family apoptosis regulator	1.35996	0.000219962	Cytoplasm	transporter	3
ENSMUSG00000038668	Lpar1	lysophosphatidic acid receptor 1	6.53094	8.75679e-07	Plasma Membrane	G-protein coupled receptor	16
ENSMUSG00000038708	Golga4	golgin A4	1.14485	1.23891e-05	Cytoplasm	other	9
ENSMUSG00000038740	Mvb12b	multivesicular body subunit 12B	1.09507	0.0472644	Cytoplasm	other	2
ENSMUSG00000038780	Smurf1	SMAD specific E3 ubiquitin protein ligase 1	2.15639	9.72525e-09	Cytoplasm	enzyme	12
ENSMUSG00000038816	Ctnnal1	catenin alpha like 1	3.77149	0.016636	Plasma Membrane	other	2
ENSMUSG00000038831	Ralgps1	Ral GEF with PH domain and SH3 binding motif 1	1.40146	0.0408965	Cytoplasm	other	1
ENSMUSG00000038976	Ppp1r9b	protein phosphatase 1 regulatory subunit 9B	-1.50771	0.000772043	Cytoplasm	enzyme	8
ENSMUSG00000072941	Sod3	superoxide dismutase 3	6.70059	0.000721752	Extracellular Space	enzyme	2
ENSMUSG00000039115	Itga9	integrin subunit alpha 9	6.46942	5.22894e-19	Plasma Membrane	other	4
ENSMUSG00000039137	Whrn	whirlin	2.98034	0.0011948	Plasma Membrane	other	3
ENSMUSG00000031137	Fgf13	fibroblast growth factor 13	2.36162	0.029458	Extracellular Space	growth factor	10
ENSMUSG00000039270	Megf9	multiple EGF like domains 9	-1.45309	0.000364614	Extracellular Space	other	3
ENSMUSG00000039323	Igfbp2	insulin like growth factor binding protein 2	4.92593	0.000160839	Extracellular Space	other	2
ENSMUSG00000039910	Cited2	Cbp/p300 interacting transactivator with Glu/Asp rich carboxy-terminal domain 2	1.14776	0.00128967	Nucleus	transcription regulator	7
ENSMUSG00000039713	Plekhg5	pleckstrin homology and RhoGEF domain containing G5	3.73434	2.97031e-05	Cytoplasm	other	5
ENSMUSG00000039873	Neurl2	neuralized E3 ubiquitin protein ligase 2	-1.12921	0.0184066	Cytoplasm	other	3
ENSMUSG00000025880	Smad7	SMAD family member 7	1.86434	0.00139871	Nucleus	transcription regulator	15
ENSMUSG00000039942	Ptger4	prostaglandin E receptor 4	1.49871	7.77505e-07	Plasma Membrane	G-protein coupled receptor	12
ENSMUSG00000039953	Clstn1	calsyntenin 1	2.21457	0.000396191	Plasma Membrane	other	9
ENSMUSG00000039982	Dtx4	deltex E3 ubiquitin ligase 4	3.32082	1.92172e-40	Cytoplasm	enzyme	1
ENSMUSG00000040152	Thbs1	thrombospondin 1	5.11356	8.81175e-70	Extracellular Space	other	35
ENSMUSG00000032185	Carm1	coactivator associated arginine methyltransferase 1	1.17068	0.00145381	Nucleus	transcription regulator	2
ENSMUSG00000040274	Cdk6	cyclin dependent kinase 6	1.83073	3.37065e-11	Nucleus	kinase	1
ENSMUSG00000022836	Mylk	myosin light chain kinase	-2.59773	0.00225127	Cytoplasm	kinase	2
ENSMUSG00000040297	Suco	SUN domain containing ossification factor	1.17924	0.00582243	Other	other	4
ENSMUSG00000040511	Pvr	poliovirus receptor	1.75265	4.8467e-07	Plasma Membrane	other	2
ENSMUSG00000040552	C3ar1	complement C3a receptor 1	4.91229	1.42298e-36	Plasma Membrane	G-protein coupled receptor	10
ENSMUSG00000040584	Abcb1a	ATP binding cassette subfamily B member 1	1.99737	1.92629e-07	Plasma Membrane	transporter	1
ENSMUSG00000031497	Tnfsf13b	TNF superfamily member 13b	-1.03942	0.00527558	Extracellular Space	cytokine	2
ENSMUSG00000040711	Sh3pxd2b	SH3 and PX domains 2B	1.638	7.52414e-05	Cytoplasm	other	2
ENSMUSG00000040722	Scamp5	secretory carrier membrane protein 5	5.17984	5.62216e-05	Cytoplasm	other	4
ENSMUSG00000040785	Ttc3	tetratricopeptide repeat domain 3	1.24425	0.00267025	Cytoplasm	enzyme	1
ENSMUSG00000040945	Rcc2	regulator of chromosome condensation 2	1.19034	0.0115257	Nucleus	other	11
ENSMUSG00000040952	Rps19	ribosomal protein S19	-1.05945	1.68046e-05	Cytoplasm	other	6
ENSMUSG00000040998	Npnt	nephronectin	7.29462	8.03398e-08	Plasma Membrane	other	13
ENSMUSG00000025383	Il23a	interleukin 23 subunit alpha	-5.32391	0.0136019	Extracellular Space	cytokine	4
ENSMUSG00000041075	Fzd7	frizzled class receptor 7	1.38313	0.000752247	Plasma Membrane	G-protein coupled receptor	7
ENSMUSG00000041120	Nbl1	NBL1, DAN family BMP antagonist	3.88141	0.0378167	Nucleus	other	3
ENSMUSG00000041235	Chd7	chromodomain helicase DNA binding protein 7	3.31588	2.22341e-30	Nucleus	enzyme	3
ENSMUSG00000036585	Fgf1	fibroblast growth factor 1	4.9183	0.0305538	Extracellular Space	growth factor	16
ENSMUSG00000041530	Ago1	argonaute 1, RISC catalytic component	-1.28477	0.00591802	Cytoplasm	translation regulator	2
ENSMUSG00000041782	Lad1	ladinin 1	7.03259	5.21612e-05	Extracellular Space	other	3
ENSMUSG00000041841	Rpl37	ribosomal protein L37	-1.61865	8.45229e-09	Cytoplasm	other	1
ENSMUSG00000041961	Znrf3	zinc and ring finger 3	3.7919	1.16189e-09	Plasma Membrane	enzyme	8
ENSMUSG00000042050	Wdr60	WD repeat domain 60	5.17959	0.0174509	Extracellular Space	other	1
ENSMUSG00000042082	Arsb	arylsulfatase B	1.09985	0.0112804	Cytoplasm	enzyme	3
ENSMUSG00000048251	Bcl11b	B cell CLL/lymphoma 11B	2.69212	0.00161717	Nucleus	transcription regulator	3
ENSMUSG00000022900	Ildr1	immunoglobulin like domain containing receptor 1	3.1161	0.0007813	Plasma Membrane	transmembrane receptor	2
ENSMUSG00000042284	Itga1	integrin subunit alpha 1	-1.3148	0.000279029	Plasma Membrane	other	14
ENSMUSG00000042286	Stab1	stabilin 1	6.02944	8.13205e-66	Plasma Membrane	transporter	2
ENSMUSG00000000791	Il12rb1	interleukin 12 receptor subunit beta 1	2.75206	0.00222714	Plasma Membrane	transmembrane receptor	4
ENSMUSG00000042363	Lgalsl	galectin like	-1.70245	0.0258084	Other	other	2
ENSMUSG00000042476	Abcb4	ATP binding cassette subfamily B member 4	3.40584	7.7313e-06	Plasma Membrane	transporter	4
ENSMUSG00000042605	Atxn2	ataxin 2	1.11585	0.0147551	Nucleus	other	1
ENSMUSG00000000776	Polr3d	RNA polymerase III subunit D	1.20467	0.00190979	Nucleus	transcription regulator	1
ENSMUSG00000042644	Itpr3	inositol 1,4,5-trisphosphate receptor type 3	1.79231	0.0131436	Cytoplasm	ion channel	1
ENSMUSG00000042700	Sipa1l1	signal induced proliferation associated 1 like 1	1.04974	0.00113998	Cytoplasm	other	21
ENSMUSG00000032702	Kank1	KN motif and ankyrin repeat domains 1	6.22853	0.0025521	Nucleus	transcription regulator	12
ENSMUSG00000042817	Flt3	fms related tyrosine kinase 3	1.01402	0.00158717	Plasma Membrane	kinase	4
ENSMUSG00000058239	Usf2	upstream transcription factor 2, c-fos interacting	-1.16774	0.00360994	Nucleus	transcription regulator	1
ENSMUSG00000042834	Nrep	neuronal regeneration related protein	8.04578	1.20811e-07	Cytoplasm	other	11
ENSMUSG00000043017	Ptgir	prostaglandin I2 receptor	-1.74305	4.98281e-08	Plasma Membrane	G-protein coupled receptor	3
ENSMUSG00000043079	Synpo	synaptopodin	8.05596	5.019e-07	Cytoplasm	other	8
ENSMUSG00000027985	Lef1	lymphoid enhancer binding factor 1	1.58785	0.00418146	Nucleus	transcription regulator	9
ENSMUSG00000043252	Tmem64	transmembrane protein 64	2.78581	1.2482e-16	Cytoplasm	other	8
ENSMUSG00000043421	Hilpda	hypoxia inducible lipid droplet associated	3.06308	1.35302e-14	Cytoplasm	other	1
ENSMUSG00000000567	Sox9	SRY-box 9	6.08999	0.00423679	Nucleus	transcription regulator	13
ENSMUSG00000043822	Adamtsl5	ADAMTS like 5	5.83609	0.0208295	Extracellular Space	other	2
ENSMUSG00000043953	Ccrl2	C-C motif chemokine receptor like 2	3.22247	3.93054e-29	Plasma Membrane	G-protein coupled receptor	2
ENSMUSG00000044033	Ccdc141	coiled-coil domain containing 141	5.61235	0.0207821	Cytoplasm	other	3
ENSMUSG00000044080	S100a1	S100 calcium binding protein A1	-1.10493	4.79325e-06	Cytoplasm	other	6
ENSMUSG00000044147	Arf6	ADP ribosylation factor 6	2.6766	1.98481e-17	Plasma Membrane	transporter	14
ENSMUSG00000048047	Zbtb33	zinc finger and BTB domain containing 33	-2.01784	0.00426106	Nucleus	transcription regulator	2
ENSMUSG00000044337	Ackr3	atypical chemokine receptor 3	6.44972	0.00426106	Plasma Membrane	G-protein coupled receptor	2
ENSMUSG00000044345	Marveld1	MARVEL domain containing 1	2.77127	5.64956e-06	Other	other	1
ENSMUSG00000044548	Dact1	dishevelled binding antagonist of beta catenin 1	5.59352	0.0257757	Cytoplasm	other	11
ENSMUSG00000044857	Lemd2	LEM domain containing 2	2.64213	2.8864e-15	Nucleus	other	1
ENSMUSG00000045005	Fzd5	frizzled class receptor 5	2.15061	0.0119431	Plasma Membrane	G-protein coupled receptor	22
ENSMUSG00000040276	Pacsin1	protein kinase C and casein kinase substrate in neurons 1	3.5233	0.00554374	Cytoplasm	kinase	10
ENSMUSG00000045039	Megf8	multiple EGF like domains 8	-1.92556	0.00368949	Extracellular Space	other	9
ENSMUSG00000045092	S1pr1	sphingosine-1-phosphate receptor 1	2.13136	1.4721e-10	Plasma Membrane	G-protein coupled receptor	6
ENSMUSG00000045094	Arhgef37	Rho guanine nucleotide exchange factor 37	-1.11424	0.000365589	Other	other	3
ENSMUSG00000045095	Magi1	membrane associated guanylate kinase, WW and PDZ domain containing 1	6.21351	0.00468423	Plasma Membrane	kinase	5
ENSMUSG00000045128	Rpl18a	ribosomal protein L18a	-1.27643	2.64664e-08	Cytoplasm	other	4
ENSMUSG00000045287	Rtn4rl1	reticulon 4 receptor like 1	3.83259	0.0357487	Plasma Membrane	other	6
ENSMUSG00000045377	Tmem88	transmembrane protein 88	3.18166	0.000127698	Plasma Membrane	other	5
ENSMUSG00000045382	Cxcr4	C-X-C motif chemokine receptor 4	1.51232	0.00217844	Plasma Membrane	G-protein coupled receptor	18
ENSMUSG00000045394	Epcam	epithelial cell adhesion molecule	7.59764	2.75397e-06	Plasma Membrane	other	4
ENSMUSG00000045664	Cdc42ep2	CDC42 effector protein 2	-1.38661	4.14239e-10	Plasma Membrane	other	5
ENSMUSG00000045672	Col27a1	collagen type XXVII alpha 1 chain	3.76114	7.62622e-06	Extracellular Space	other	4
ENSMUSG00000045795	Whamm	WAS protein homolog associated with actin, golgi membranes and microtubules	1.29293	0.0159866	Cytoplasm	other	7
ENSMUSG00000045827	Serpinb9	serpin family B member 9	1.48878	0.000533263	Cytoplasm	other	2
ENSMUSG00000046034	Otulin	OTU deubiquitinase with linear linkage specificity	2.93205	2.8002e-19	Cytoplasm	peptidase	6
ENSMUSG00000046058	Eid2	EP300 interacting inhibitor of differentiation 2	5.66963	0.00840246	Nucleus	other	6
ENSMUSG00000046080	Clec9a	C-type lectin domain containing 9A	3.53318	0.00394084	Plasma Membrane	other	4
ENSMUSG00000046186	Cd109	CD109 molecule	8.40854	6.75329e-09	Plasma Membrane	other	8
ENSMUSG00000068758	Il3ra	interleukin 3 receptor subunit alpha	-1.3628	0.00858319	Plasma Membrane	transmembrane receptor	2
ENSMUSG00000046432	Bex3	brain expressed X-linked 3	1.60941	2.64829e-07	Cytoplasm	other	1
ENSMUSG00000046447	Camk2n1	calcium/calmodulin dependent protein kinase II inhibitor 1	1.9307	0.041929	Plasma Membrane	kinase	4
ENSMUSG00000022607	Ptk2	protein tyrosine kinase 2	1.63646	0.0129299	Cytoplasm	kinase	42
ENSMUSG00000046733	Gprc5a	G protein-coupled receptor class C group 5 member A	6.14773	3.73601e-06	Plasma Membrane	G-protein coupled receptor	2
ENSMUSG00000046753	Ccdc66	coiled-coil domain containing 66	1.19974	0.0464592	Cytoplasm	other	1
ENSMUSG00000046768	Rhoj	ras homolog family member J	-2.77226	0.00503812	Cytoplasm	enzyme	15
ENSMUSG00000022508	Bcl6	B cell CLL/lymphoma 6	-1.15668	0.00465764	Nucleus	transcription regulator	6
ENSMUSG00000046985	Tapt1	transmembrane anterior posterior transformation 1	1.19061	2.0507e-05	Plasma Membrane	G-protein coupled receptor	3
ENSMUSG00000047181	Samd14	sterile alpha motif domain containing 14	-2.6792	0.0232944	Other	other	4
ENSMUSG00000047193	Dync2h1	dynein cytoplasmic 2 heavy chain 1	-2.13328	0.00544259	Cytoplasm	other	2
ENSMUSG00000047250	Ptgs1	prostaglandin-endoperoxide synthase 1	2.18189	1.54992e-08	Cytoplasm	enzyme	4
ENSMUSG00000047368	Abhd17b	abhydrolase domain containing 17B	1.41352	2.44565e-05	Plasma Membrane	peptidase	10
ENSMUSG00000047388	Atmin	ATM interactor	1.31129	2.65532e-05	Nucleus	other	3
ENSMUSG00000042745	Id1	inhibitor of DNA binding 1, HLH protein	-1.11522	0.00510407	Nucleus	transcription regulator	10
ENSMUSG00000047414	Flrt2	fibronectin leucine rich transmembrane protein 2	5.12389	0.0301461	Plasma Membrane	other	14
ENSMUSG00000047712	Ust	uronyl 2-sulfotransferase	2.01291	2.30677e-07	Cytoplasm	enzyme	5
ENSMUSG00000047798	Cd300lf	CD300 molecule like family member f	2.02875	1.03863e-20	Plasma Membrane	other	3
ENSMUSG00000047854	Stx19	syntaxin 19	-5.43374	0.00806012	Other	other	1
ENSMUSG00000047953	Gp5	glycoprotein V platelet	-11.1052	9.81013e-18	Plasma Membrane	other	1
ENSMUSG00000020185	E2f7	E2F transcription factor 7	4.94446	0.00526949	Nucleus	transcription regulator	1
ENSMUSG00000048109	Rbm15	RNA binding motif protein 15	2.05942	1.16958e-11	Nucleus	other	2
ENSMUSG00000048120	Entpd1	ectonucleoside triphosphate diphosphohydrolase 1	1.39551	2.61268e-07	Plasma Membrane	enzyme	7
ENSMUSG00000048126	Col6a3	collagen type VI alpha 3 chain	6.81257	0.000298214	Extracellular Space	other	2
ENSMUSG00000048142	Nat8l	N-acetyltransferase 8 like	-2.45261	1.02023e-08	Cytoplasm	enzyme	1
ENSMUSG00000002068	Ccne1	cyclin E1	2.30837	0.00700211	Nucleus	transcription regulator	2
ENSMUSG00000000861	Bcl11a	B cell CLL/lymphoma 11A	-1.07775	0.00717206	Nucleus	transcription regulator	17
ENSMUSG00000048521	Cxcr6	C-X-C motif chemokine receptor 6	5.45358	0.0332236	Plasma Membrane	G-protein coupled receptor	1
ENSMUSG00000049109	Themis	thymocyte selection associated	5.33867	0.00143926	Cytoplasm	other	1
ENSMUSG00000049130	C5ar1	complement C5a receptor 1	2.74502	4.20587e-34	Plasma Membrane	G-protein coupled receptor	12
ENSMUSG00000049538	Adamts16	ADAM metallopeptidase with thrombospondin type 1 motif 16	6.31223	0.0122508	Extracellular Space	other	2
ENSMUSG00000049625	Tifab	TIFA inhibitor	-1.05033	2.65799e-05	Other	other	1
ENSMUSG00000018623	Mmp7	matrix metallopeptidase 7	5.53988	0.0265605	Extracellular Space	peptidase	3
ENSMUSG00000049907	Rasl11b	RAS like family 11 member B	6.61211	0.000479537	Plasma Membrane	enzyme	7
ENSMUSG00000049922	Slc35c1	solute carrier family 35 member C1	-1.45419	6.08543e-07	Cytoplasm	transporter	2
ENSMUSG00000005465	Il27ra	interleukin 27 receptor subunit alpha	1.09129	0.0105959	Plasma Membrane	transmembrane receptor	2
ENSMUSG00000050271	Prag1	PEAK1 related, kinase-activating pseudokinase 1	3.03826	7.46072e-07	Nucleus	kinase	8
ENSMUSG00000050315	Synpo2	synaptopodin 2	6.09	0.0275544	Cytoplasm	other	3
ENSMUSG00000050350	Gpr18	G protein-coupled receptor 18	-1.21152	6.30554e-08	Plasma Membrane	G-protein coupled receptor	3
ENSMUSG00000079685	Ulbp1	UL16 binding protein 1	2.85022	0.0116571	Plasma Membrane	transmembrane receptor	4
ENSMUSG00000050921	P2ry10	P2Y receptor family member 10	3.71587	1.21541e-17	Plasma Membrane	G-protein coupled receptor	3
ENSMUSG00000050953	Gja1	gap junction protein alpha 1	6.52473	1.69048e-06	Plasma Membrane	transporter	21
ENSMUSG00000050989	Selenon	selenoprotein N	1.5248	3.54409e-05	Cytoplasm	other	1
ENSMUSG00000051314	Ffar2	free fatty acid receptor 2	3.85231	6.61915e-05	Plasma Membrane	G-protein coupled receptor	4
ENSMUSG00000051379	Flrt3	fibronectin leucine rich transmembrane protein 3	10.922	3.52785e-17	Plasma Membrane	other	18
ENSMUSG00000028128	F3	coagulation factor III, tissue factor	6.25518	0.0183234	Plasma Membrane	transmembrane receptor	14
ENSMUSG00000051517	Arhgef39	Rho guanine nucleotide exchange factor 39	2.77079	0.0205999	Plasma Membrane	other	3
ENSMUSG00000051615	Rap2a	RAP2A, member of RAS oncogene family	1.81726	1.26974e-12	Plasma Membrane	enzyme	6
ENSMUSG00000052142	Rasal3	RAS protein activator like 3	1.38479	1.26801e-08	Cytoplasm	other	1
ENSMUSG00000052212	Cd177	CD177 molecule	-1.66909	1.99705e-16	Cytoplasm	other	4
ENSMUSG00000020275	Rel	REL proto-oncogene, NF-kB subunit	1.21501	0.00743539	Nucleus	transcription regulator	3
ENSMUSG00000052512	Nav2	neuron navigator 2	2.09263	0.00103008	Nucleus	other	2
ENSMUSG00000035873	Pawr	pro-apoptotic WT1 regulator	5.89229	0.00887644	Nucleus	transcription regulator	4
ENSMUSG00000052688	Rab7b	RAB7B, member RAS oncogene family	2.48472	1.01914e-22	Cytoplasm	peptidase	2
ENSMUSG00000030699	Tbx6	T-box 6	-3.8589	0.00919694	Nucleus	transcription regulator	2
ENSMUSG00000046707	Csnk2a2	casein kinase 2 alpha 2	-1.09465	0.0145259	Cytoplasm	kinase	2
ENSMUSG00000052911	Lamb2	laminin subunit beta 2	2.6191	0.00110495	Extracellular Space	enzyme	15
ENSMUSG00000052914	Cyp2j6	cytochrome P450 family 2 subfamily J member 2	5.98788	0.00887436	Cytoplasm	enzyme	6
ENSMUSG00000052957	Gas1	growth arrest specific 1	7.12399	0.000672709	Plasma Membrane	other	2
ENSMUSG00000053004	Hrh1	histamine receptor H1	5.43793	1.74038e-06	Plasma Membrane	G-protein coupled receptor	7
ENSMUSG00000053062	Jam2	junctional adhesion molecule 2	6.85111	6.41083e-13	Plasma Membrane	other	4
ENSMUSG00000001517	Foxm1	forkhead box M1	2.34892	0.00935674	Nucleus	transcription regulator	2
ENSMUSG00000053113	Socs3	suppressor of cytokine signaling 3	1.18985	3.3253e-09	Cytoplasm	phosphatase	1
ENSMUSG00000053310	Nrgn	neurogranin	-5.73796	1.07712e-50	Plasma Membrane	other	6
ENSMUSG00000053317	Sec61b	Sec61 translocon beta subunit	-1.12483	5.12046e-06	Cytoplasm	transporter	1
ENSMUSG00000053398	Phgdh	phosphoglycerate dehydrogenase	2.93956	1.28274e-18	Cytoplasm	enzyme	2
ENSMUSG00000031161	Hdac6	histone deacetylase 6	1.05051	0.0103106	Nucleus	transcription regulator	10
ENSMUSG00000053581	Zfand2a	zinc finger AN1-type containing 2A	1.44786	2.51206e-05	Other	other	1
ENSMUSG00000053931	Cnn3	calponin 3	1.31362	2.90576e-05	Cytoplasm	other	6
ENSMUSG00000054200	Ffar4	free fatty acid receptor 4	1.9258	0.014588	Plasma Membrane	G-protein coupled receptor	2
ENSMUSG00000054293	P2ry10b	purinergic receptor P2Y, G-protein coupled 10B	-1.28284	9.62299e-06	Plasma Membrane	G-protein coupled receptor	3
ENSMUSG00000054641	Mmrn1	multimerin 1	-9.88522	7.59996e-12	Extracellular Space	other	2
ENSMUSG00000054766	Set	SET nuclear proto-oncogene	1.14648	4.28144e-08	Nucleus	phosphatase	5
ENSMUSG00000042821	Snai1	snail family transcriptional repressor 1	5.96746	0.0106348	Nucleus	transcription regulator	9
ENSMUSG00000030772	Dkk3	dickkopf WNT signaling pathway inhibitor 3	6.32381	0.0138938	Extracellular Space	cytokine	5
ENSMUSG00000055322	Tns1	tensin 1	3.87455	8.32264e-09	Plasma Membrane	other	6
ENSMUSG00000055653	Gpc3	glypican 3	3.03201	0.0112033	Plasma Membrane	other	11
ENSMUSG00000055723	Rras2	RAS related 2	1.77699	4.73804e-05	Plasma Membrane	enzyme	2
ENSMUSG00000055782	Abcd2	ATP binding cassette subfamily D member 2	-1.47258	2.33676e-07	Cytoplasm	transporter	2
ENSMUSG00000024238	Zeb1	zinc finger E-box binding homeobox 1	1.15913	0.0174423	Nucleus	transcription regulator	9
ENSMUSG00000056054	S100a8	S100 calcium binding protein A8	2.24171	0.0104326	Cytoplasm	other	1
ENSMUSG00000056071	S100a9	S100 calcium binding protein A9	3.51962	0.0099825	Cytoplasm	other	4
ENSMUSG00000056174	Col8a2	collagen type VIII alpha 2 chain	3.96927	0.0005813	Extracellular Space	other	5
ENSMUSG00000055866	Per2	period circadian regulator 2	2.82524	0.0180667	Nucleus	transcription regulator	4
ENSMUSG00000056529	Ptafr	platelet activating factor receptor	2.63544	1.62019e-26	Plasma Membrane	G-protein coupled receptor	7
ENSMUSG00000056758	Hmga2	high mobility group AT-hook 2	-5.91165	0.0120882	Nucleus	enzyme	8
ENSMUSG00000056851	Pcbp2	poly(rC) binding protein 2	-1.20466	0.00135144	Nucleus	other	4
ENSMUSG00000028965	Tnfrsf9	TNF receptor superfamily member 9	1.47283	0.021115	Plasma Membrane	transmembrane receptor	3
ENSMUSG00000001729	Akt1	AKT serine/threonine kinase 1	1.97359	0.029384	Cytoplasm	kinase	25
ENSMUSG00000057322	Rpl38	ribosomal protein L38	-1.19342	1.09291e-06	Cytoplasm	other	4
ENSMUSG00000057329	Bcl2	BCL2, apoptosis regulator	1.03795	0.00120719	Cytoplasm	transporter	23
ENSMUSG00000057531	Dtnbp1	dystrobrevin binding protein 1	2.27601	3.5425e-27	Plasma Membrane	other	21
ENSMUSG00000057554	Lgals8	galectin 8	1.10935	5.35368e-06	Extracellular Space	other	2
ENSMUSG00000057691	Zfp746	zinc finger protein 746	1.75261	1.37931e-05	Cytoplasm	transcription regulator	1
ENSMUSG00000057789	Bak1	BCL2 antagonist/killer 1	-1.88585	0.000510327	Cytoplasm	other	3
ENSMUSG00000058056	Palld	palladin, cytoskeletal associated protein	1.84625	0.000100304	Plasma Membrane	other	1
ENSMUSG00000052374	Actn2	actinin alpha 2	5.72366	0.0185099	Nucleus	transcription regulator	14
ENSMUSG00000026700	Tnfsf4	TNF superfamily member 4	4.66367	0.0219108	Extracellular Space	cytokine	8
ENSMUSG00000016637	Ift27	intraflagellar transport 27	-1.00801	0.00142597	Extracellular Space	enzyme	1
ENSMUSG00000058600	Rpl30	ribosomal protein L30	-1.77213	8.3517e-10	Cytoplasm	other	4
ENSMUSG00000028362	Tnfsf8	TNF superfamily member 8	2.59257	0.024071	Plasma Membrane	cytokine	2
ENSMUSG00000030551	Nr2f2	nuclear receptor subfamily 2 group F member 2	5.36219	0.0427295	Nucleus	ligand-dependent nuclear receptor	9
ENSMUSG00000073802	Cdkn2b	cyclin dependent kinase inhibitor 2B	4.01224	0.0228646	Nucleus	transcription regulator	7
ENSMUSG00000059248	Sept9	septin 9	-1.13728	0.0027479	Cytoplasm	enzyme	3
ENSMUSG00000042607	Asb4	ankyrin repeat and SOCS box containing 4	5.92136	0.0316819	Nucleus	transcription regulator	3
ENSMUSG00000059588	Calcrl	calcitonin receptor like receptor	-1.29041	0.00134763	Plasma Membrane	G-protein coupled receptor	3
ENSMUSG00000049723	Mmp12	matrix metallopeptidase 12	4.76181	0.0321165	Extracellular Space	peptidase	6
ENSMUSG00000042333	Tnfrsf14	TNF receptor superfamily member 14	-1.04527	0.0277668	Plasma Membrane	transmembrane receptor	4
ENSMUSG00000045038	Prkce	protein kinase C epsilon	-1.35637	0.0293865	Cytoplasm	kinase	1
ENSMUSG00000023235	Ccl25	C-C motif chemokine ligand 25	-1.01484	0.030832	Extracellular Space	cytokine	2
ENSMUSG00000024401	Tnf	tumor necrosis factor	1.01858	0.0444062	Extracellular Space	cytokine	40
ENSMUSG00000039239	Tgfb2	transforming growth factor beta 2	4.74839	0.0400455	Extracellular Space	growth factor	24
ENSMUSG00000060550	H2-Q7	major histocompatibility complex, class I, A	1.66796	5.36737e-08	Plasma Membrane	other	1
ENSMUSG00000060572	Mfap2	microfibril associated protein 2	5.55738	0.0017687	Extracellular Space	other	2
ENSMUSG00000061665	Cd2ap	CD2 associated protein	-1.09713	0.000884251	Cytoplasm	other	3
ENSMUSG00000061740	Cyp2d22	cytochrome P450, family 2, subfamily d, polypeptide 22	-3.27237	0.0404357	Cytoplasm	enzyme	3
ENSMUSG00000014932	Yes1	YES proto-oncogene 1, Src family tyrosine kinase	5.74703	0.0437206	Cytoplasm	kinase	4
ENSMUSG00000062098	Btbd3	BTB domain containing 3	2.24661	0.000487436	Other	other	3
ENSMUSG00000062232	Rapgef2	Rap guanine nucleotide exchange factor 2	1.03167	0.0202463	Cytoplasm	other	24
ENSMUSG00000026012	Cd28	CD28 molecule	1.72946	0.0279468	Plasma Membrane	transmembrane receptor	4
ENSMUSG00000062372	Otof	otoferlin	-1.48223	0.000894428	Plasma Membrane	other	1
ENSMUSG00000062373	Tmem65	transmembrane protein 65	1.90986	1.4606e-14	Cytoplasm	other	1
ENSMUSG00000062661	Ncs1	neuronal calcium sensor 1	9.09943	6.01759e-11	Plasma Membrane	other	1
ENSMUSG00000062960	Kdr	kinase insert domain receptor	5.80422	3.7997e-12	Plasma Membrane	kinase	38
ENSMUSG00000063142	Kcnma1	potassium calcium-activated channel subfamily M alpha 1	5.77132	0.0126026	Plasma Membrane	ion channel	7
ENSMUSG00000063506	Arhgap22	Rho GTPase activating protein 22	3.60728	2.18221e-13	Cytoplasm	other	4
ENSMUSG00000063646	Jakmip1	janus kinase and microtubule interacting protein 1	1.92857	0.000113778	Cytoplasm	translation regulator	1
ENSMUSG00000063838	Cdc42ep5	CDC42 effector protein 5	-5.37843	0.000842951	Cytoplasm	other	5
ENSMUSG00000063856	Gpx1	glutathione peroxidase 1	-1.51308	1.18209e-12	Cytoplasm	enzyme	12
ENSMUSG00000000901	Mmp11	matrix metallopeptidase 11	5.81042	0.0394565	Extracellular Space	peptidase	5
ENSMUSG00000064145	Arih2	ariadne RBR E3 ubiquitin protein ligase 2	1.06295	0.000859785	Nucleus	enzyme	2
ENSMUSG00000000693	Loxl3	lysyl oxidase like 3	1.91002	0.00222899	Extracellular Space	enzyme	3
ENSMUSG00000064330	Pde6h	phosphodiesterase 6H	-6.12643	0.00583198	Cytoplasm	enzyme	2
ENSMUSG00000064345	mt-Nd2	MTND2	-2.6293	0.000398178	Cytoplasm	enzyme	4
ENSMUSG00000066643	Wdr35	WD repeat domain 35	5.62105	0.00426106	Cytoplasm	other	8
ENSMUSG00000067274	Rplp0	ribosomal protein lateral stalk subunit P0	-1.33983	1.0697e-10	Cytoplasm	other	4
ENSMUSG00000067336	Bmpr2	bone morphogenetic protein receptor type 2	-1.40734	0.000183024	Plasma Membrane	kinase	35
ENSMUSG00000068740	Celsr2	cadherin EGF LAG seven-pass G-type receptor 2	-5.42415	0.0483796	Plasma Membrane	G-protein coupled receptor	6
ENSMUSG00000049929	Lpar4	lysophosphatidic acid receptor 4	4.91949	0.0302098	Plasma Membrane	transmembrane receptor	3
ENSMUSG00000069255	Dusp22	dual specificity phosphatase 22	-1.15781	5.65749e-10	Cytoplasm	phosphatase	10
ENSMUSG00000069763	Tmem100	transmembrane protein 100	9.02825	2.9155e-09	Plasma Membrane	other	6
ENSMUSG00000069833	Ahnak	AHNAK nucleoprotein	-1.28144	9.48556e-12	Nucleus	other	1
ENSMUSG00000070327	Rnf213	ring finger protein 213	-1.15804	0.000148834	Cytoplasm	enzyme	6
ENSMUSG00000020656	Grhl1	grainyhead like transcription factor 1	2.16721	0.0350784	Nucleus	transcription regulator	2
ENSMUSG00000070369	Itgad	integrin subunit alpha D	5.57845	0.0238463	Plasma Membrane	other	2
ENSMUSG00000070427	Il18bp	interleukin 18 binding protein	2.22491	2.6992e-07	Extracellular Space	other	1
ENSMUSG00000000782	Tcf7	transcription factor 7, T cell specific	1.70349	0.0356328	Nucleus	transcription regulator	3
ENSMUSG00000070880	Gad1	glutamate decarboxylase 1	-7.41674	2.34036e-05	Cytoplasm	enzyme	3
ENSMUSG00000059921	Unc5c	unc-5 netrin receptor C	3.24483	0.0375854	Plasma Membrane	transmembrane receptor	2
ENSMUSG00000071042	Rasgrp3	RAS guanyl releasing protein 3	4.99694	6.53803e-06	Cytoplasm	other	1
ENSMUSG00000071176	Arhgef10	Rho guanine nucleotide exchange factor 10	1.2253	0.0184723	Cytoplasm	enzyme	4
ENSMUSG00000071415	Rpl23	ribosomal protein L23	-1.41814	1.07972e-05	Cytoplasm	other	4
ENSMUSG00000071552	Tigit	T cell immunoreceptor with Ig and ITIM domains	4.16263	0.00117446	Plasma Membrane	other	1
ENSMUSG00000019846	Lama4	laminin subunit alpha 4	6.37262	0.0365481	Extracellular Space	enzyme	3
ENSMUSG00000072964	Bhlhb9	basic helix-loop-helix family member b9	2.30777	1.55721e-05	Cytoplasm	other	21
ENSMUSG00000073412	Lst1	leukocyte specific transcript 1	-1.62996	2.24609e-14	Cytoplasm	other	1
ENSMUSG00000073414	Mpig6b	megakaryocyte and platelet inhibitory receptor G6b	-9.22647	5.53397e-12	Plasma Membrane	other	1
ENSMUSG00000005102	Eif2ak4	eukaryotic translation initiation factor 2 alpha kinase 4	1.02247	0.0468867	Cytoplasm	kinase	3
ENSMUSG00000073599	Ecscr	endothelial cell surface expressed chemotaxis and apoptosis regulator	9.91885	6.23981e-13	Other	other	5
ENSMUSG00000073678	Pgap1	post-GPI attachment to proteins 1	-1.43764	2.43664e-06	Cytoplasm	enzyme	1
ENSMUSG00000040183	Ankrd6	ankyrin repeat domain 6	4.80199	0.0407108	Nucleus	transcription regulator	8
ENSMUSG00000073805	Fam196a	inhibitory synaptic factor 2A	-2.63798	0.0117428	Plasma Membrane	other	4
ENSMUSG00000074227	Spint2	serine peptidase inhibitor, Kunitz type 2	2.35946	4.59082e-08	Extracellular Space	other	3
ENSMUSG00000074361	C5ar2	complement component 5a receptor 2	2.19155	4.32455e-08	Plasma Membrane	G-protein coupled receptor	2
ENSMUSG00000074505	Fat3	FAT atypical cadherin 3	6.15902	0.00436346	Plasma Membrane	other	3
ENSMUSG00000028613	Lrp8	LDL receptor related protein 8	3.93449	0.0389973	Plasma Membrane	transmembrane receptor	20
ENSMUSG00000075254	Heg1	heart development protein with EGF like domains 1	1.38413	5.66161e-05	Plasma Membrane	other	10
ENSMUSG00000075470	Alg10b	ALG10, alpha-1,2-glucosyltransferase	-1.31627	0.000336509	Cytoplasm	enzyme	1
ENSMUSG00000046876	Atxn1	ataxin 1	1.32442	0.0407373	Nucleus	transcription regulator	1
ENSMUSG00000076441	Ass1	argininosuccinate synthase 1	1.2006	0.000123745	Cytoplasm	enzyme	3
ENSMUSG00000078794	Dact3	dishevelled binding antagonist of beta catenin 3	6.14069	0.00531383	Cytoplasm	other	5
ENSMUSG00000030336	Cd27	CD27 molecule	1.30384	0.0431865	Plasma Membrane	transmembrane receptor	1
ENSMUSG00000079017	Ifi27l2a	interferon, alpha-inducible protein 27 like 2A	-1.03362	0.0031366	Cytoplasm	other	1
ENSMUSG00000079037	Prnp	prion protein	2.39084	7.9966e-07	Plasma Membrane	other	14
ENSMUSG00000053110	Yap1	Yes associated protein 1	-5.43028	0.0489043	Nucleus	transcription regulator	7
ENSMUSG00000079110	Capn3	calpain 3	1.53907	0.0073627	Cytoplasm	peptidase	2
ENSMUSG00000022865	Cxadr	CXADR, Ig-like cell adhesion molecule	4.72928	0.0442146	Plasma Membrane	transmembrane receptor	8
ENSMUSG00000079227	Ccr5	C-C motif chemokine receptor 5 (gene/pseudogene)	2.83581	1.1165e-25	Plasma Membrane	G-protein coupled receptor	12
ENSMUSG00000036766	Dner	delta/notch like EGF repeat containing	3.23139	0.045645	Plasma Membrane	transmembrane receptor	1
ENSMUSG00000085079	Khdc1b	KH domain containing 1 like	4.29474	0.0121792	Cytoplasm	other	1
ENSMUSG00000090862	Rps13	ribosomal protein S13	-1.39403	2.75397e-06	Cytoplasm	other	4
ENSMUSG00000091971	Hspa1a	heat shock protein family A (Hsp70) member 1A	2.74281	7.74974e-15	Cytoplasm	enzyme	1
ENSMUSG00000096054	Syne1	spectrin repeat containing nuclear envelope protein 1	1.55919	0.00147341	Nucleus	other	9
ENSMUSG00000097589	Dleu2	deleted in lymphocytic leukemia, 2	-1.20771	1.24746e-06	Other	other	2
ENSMUSG00000109511	Nup62	nucleoporin 62	1.04312	0.000401903	Nucleus	transporter	3
ENSMUSG00000116165	Pdxp	pyridoxal phosphatase	2.49215	0.0105841	Plasma Membrane	phosphatase	3

## Sheet: transcription regulator
ID	Genes	Entrez Gene Name	log2FoldChange	padj	Location	Type	number_GO
ENSMUSG00000038418	Egr1	early growth response 1	4.77651	4.28996e-73	Nucleus	transcription regulator	18
ENSMUSG00000056501	Cebpb	CCAAT enhancer binding protein beta	5.06689	4.55503e-58	Nucleus	transcription regulator	11
ENSMUSG00000027660	Skil	SKI like proto-oncogene	3.34581	1.79911e-41	Nucleus	transcription regulator	13
ENSMUSG00000013089	Etv5	ETS variant 5	4.01481	3.40648e-33	Nucleus	transcription regulator	5
ENSMUSG00000052837	Junb	JunB proto-oncogene, AP-1 transcription factor subunit	2.16934	3.95123e-28	Nucleus	transcription regulator	2
ENSMUSG00000022346	Myc	MYC proto-oncogene, bHLH transcription factor	2.92512	1.83896e-26	Nucleus	transcription regulator	10
ENSMUSG00000070348	Ccnd1	cyclin D1	4.57739	2.10544e-26	Nucleus	transcription regulator	7
ENSMUSG00000030103	Bhlhe40	basic helix-loop-helix family member e40	3.51823	2.74484e-25	Nucleus	transcription regulator	1
ENSMUSG00000053580	Tanc2	tetratricopeptide repeat, ankyrin repeat and coiled-coil containing 2	6.63322	7.84382e-22	Nucleus	transcription regulator	4
ENSMUSG00000076431	Sox4	SRY-box 4	5.08486	2.85e-21	Nucleus	transcription regulator	6
ENSMUSG00000030256	Bhlhe41	basic helix-loop-helix family, member e41	5.95884	2.65811e-19	Nucleus	transcription regulator	1
ENSMUSG00000032515	Csrnp1	cysteine and serine rich nuclear protein 1	2.92225	6.61298e-17	Nucleus	transcription regulator	1
ENSMUSG00000059325	Hopx	HOP homeobox	-2.53159	4.04981e-16	Nucleus	transcription regulator	1
ENSMUSG00000022479	Vdr	vitamin D receptor	3.05774	8.69844e-16	Nucleus	transcription regulator	4
ENSMUSG00000024912	Fosl1	FOS like 1, AP-1 transcription factor subunit	5.16394	4.79632e-15	Nucleus	transcription regulator	1
ENSMUSG00000052684	Jun	Jun proto-oncogene, AP-1 transcription factor subunit	1.93278	1.44652e-14	Nucleus	transcription regulator	24
ENSMUSG00000024985	Tcf7l2	transcription factor 7 like 2	1.82969	4.43732e-14	Nucleus	transcription regulator	11
ENSMUSG00000031665	Sall1	spalt like transcription factor 1	10.1945	1.45431e-13	Nucleus	transcription regulator	5
ENSMUSG00000002881	Nab1	NGFI-A binding protein 1	1.83767	1.53091e-13	Nucleus	transcription regulator	1
ENSMUSG00000020423	Btg2	BTG anti-proliferation factor 2	1.76966	2.4332e-13	Nucleus	transcription regulator	7
ENSMUSG00000001289	Pfdn5	prefoldin subunit 5	-1.47771	5.51635e-12	Nucleus	transcription regulator	5
ENSMUSG00000058794	Nfe2	nuclear factor, erythroid 2	-1.49399	1.09311e-11	Nucleus	transcription regulator	1
ENSMUSG00000028654	Mycl	MYCL proto-oncogene, bHLH transcription factor	3.59488	3.97236e-11	Nucleus	transcription regulator	1
ENSMUSG00000021109	Hif1a	hypoxia inducible factor 1 subunit alpha	1.46689	7.11624e-11	Nucleus	transcription regulator	29
ENSMUSG00000047407	Tgif1	TGFB induced factor homeobox 1	1.73071	2.94429e-09	Nucleus	transcription regulator	1
ENSMUSG00000028042	Zbtb7b	zinc finger and BTB domain containing 7B	-1.96851	5.65888e-09	Nucleus	transcription regulator	1
ENSMUSG00000022951	Rcan1	regulator of calcineurin 1	1.44213	8.11204e-09	Nucleus	transcription regulator	1
ENSMUSG00000038533	Cbfa2t2	CBFA2/RUNX1 translocation partner 2	1.53934	9.02341e-09	Nucleus	transcription regulator	5
ENSMUSG00000025223	Ldb1	LIM domain binding 1	1.8012	1.00825e-08	Nucleus	transcription regulator	9
ENSMUSG00000024927	Rela	RELA proto-oncogene, NF-kB subunit	1.12813	1.26407e-08	Nucleus	transcription regulator	1
ENSMUSG00000037868	Egr2	early growth response 2	5.22418	5.85079e-08	Nucleus	transcription regulator	3
ENSMUSG00000024565	Sall3	spalt like transcription factor 3	8.32586	6.15589e-08	Nucleus	transcription regulator	1
ENSMUSG00000032035	Ets1	ETS proto-oncogene 1, transcription factor	1.85182	9.63736e-08	Nucleus	transcription regulator	12
ENSMUSG00000008305	Tle1	transducin like enhancer of split 1	1.40564	2.27119e-07	Nucleus	transcription regulator	5
ENSMUSG00000021250	Fos	Fos proto-oncogene, AP-1 transcription factor subunit	1.59467	4.06404e-07	Nucleus	transcription regulator	4
ENSMUSG00000021127	Zfp36l1	ZFP36 ring finger protein like 1	1.62235	2.20004e-06	Nucleus	transcription regulator	4
ENSMUSG00000031925	Maml2	mastermind like transcriptional coactivator 2	1.95341	2.26819e-06	Nucleus	transcription regulator	1
ENSMUSG00000024206	Rfx2	regulatory factor X2	-1.40147	2.44221e-06	Nucleus	transcription regulator	1
ENSMUSG00000021356	Irf4	interferon regulatory factor 4	-1.46391	3.04962e-06	Nucleus	transcription regulator	4
ENSMUSG00000036306	Lzts1	leucine zipper tumor suppressor 1	4.12202	4.20239e-06	Nucleus	transcription regulator	10
ENSMUSG00000043716	Rpl7	ribosomal protein L7	-1.53092	4.2133e-06	Nucleus	transcription regulator	4
ENSMUSG00000022528	Hes1	hes family bHLH transcription factor 1	1.33158	5.72766e-06	Nucleus	transcription regulator	7
ENSMUSG00000048450	Msx1	msh homeobox 1	7.60934	9.06602e-06	Nucleus	transcription regulator	2
ENSMUSG00000070691	Runx3	runt related transcription factor 3	1.28369	9.20807e-06	Nucleus	transcription regulator	3
ENSMUSG00000036432	Siah2	siah E3 ubiquitin protein ligase 2	1.72879	1.07582e-05	Nucleus	transcription regulator	5
ENSMUSG00000043099	Hic1	HIC ZBTB transcriptional repressor 1	5.2329	1.14281e-05	Nucleus	transcription regulator	3
ENSMUSG00000028034	Fubp1	far upstream element binding protein 1	1.11562	1.40426e-05	Nucleus	transcription regulator	1
ENSMUSG00000018160	Med1	mediator complex subunit 1	1.00484	2.06626e-05	Nucleus	transcription regulator	2
ENSMUSG00000001419	Mef2d	myocyte enhancer factor 2D	1.4277	2.16774e-05	Nucleus	transcription regulator	6
ENSMUSG00000026313	Hdac4	histone deacetylase 4	1.12405	2.67895e-05	Nucleus	transcription regulator	12
ENSMUSG00000017861	Mybl2	MYB proto-oncogene like 2	4.96215	3.19443e-05	Nucleus	transcription regulator	3
ENSMUSG00000020184	Mdm2	MDM2 proto-oncogene	1.13558	3.58612e-05	Nucleus	transcription regulator	12
ENSMUSG00000009569	Mkl2	myocardin related transcription factor B	1.36358	3.64419e-05	Nucleus	transcription regulator	2
ENSMUSG00000022228	Zscan26	zinc finger and SCAN domain containing 26	1.63927	3.73328e-05	Nucleus	transcription regulator	1
ENSMUSG00000079056	Kcnip3	potassium voltage-gated channel interacting protein 3	2.17601	5.08203e-05	Nucleus	transcription regulator	3
ENSMUSG00000039473	Ubn1	ubinuclein 1	1.2972	6.94945e-05	Nucleus	transcription regulator	4
ENSMUSG00000018983	E2f2	E2F transcription factor 2	-1.29753	0.000146339	Nucleus	transcription regulator	4
ENSMUSG00000044167	Foxo1	forkhead box O1	1.11801	0.000246201	Nucleus	transcription regulator	5
ENSMUSG00000042182	Bend6	BEN domain containing 6	3.04791	0.000278724	Nucleus	transcription regulator	3
ENSMUSG00000025408	Ddit3	DNA damage inducible transcript 3	1.2698	0.00036574	Nucleus	transcription regulator	9
ENSMUSG00000036478	Btg1	BTG anti-proliferation factor 1	1.03065	0.000381753	Nucleus	transcription regulator	6
ENSMUSG00000027230	Creb3l1	cAMP responsive element binding protein 3 like 1	1.54214	0.000383391	Nucleus	transcription regulator	10
ENSMUSG00000036867	Smad6	SMAD family member 6	2.24448	0.000401151	Nucleus	transcription regulator	10
ENSMUSG00000025402	Nab2	NGFI-A binding protein 2	1.42319	0.000412162	Nucleus	transcription regulator	1
ENSMUSG00000015619	Gata3	GATA binding protein 3	2.00144	0.000468061	Nucleus	transcription regulator	26
ENSMUSG00000001280	Sp1	Sp1 transcription factor	-1.10493	0.000520542	Nucleus	transcription regulator	13
ENSMUSG00000055148	Klf2	Kruppel like factor 2	-1.45106	0.000593505	Nucleus	transcription regulator	7
ENSMUSG00000022682	Rrn3	RRN3 homolog, RNA polymerase I transcription factor	1.13203	0.000651281	Nucleus	transcription regulator	3
ENSMUSG00000029687	Ezh2	enhancer of zeste 2 polycomb repressive complex 2 subunit	1.41658	0.000736451	Nucleus	transcription regulator	6
ENSMUSG00000024642	Tle4	transducin like enhancer of split 4	1.32322	0.000962694	Nucleus	transcription regulator	5
ENSMUSG00000032446	Eomes	eomesodermin	1.76026	0.000977451	Nucleus	transcription regulator	1
ENSMUSG00000029275	Gfi1	growth factor independent 1 transcriptional repressor	3.47602	0.00103346	Nucleus	transcription regulator	1
ENSMUSG00000039910	Cited2	Cbp/p300 interacting transactivator with Glu/Asp rich carboxy-terminal domain 2	1.14776	0.00128967	Nucleus	transcription regulator	7
ENSMUSG00000025880	Smad7	SMAD family member 7	1.86434	0.00139871	Nucleus	transcription regulator	15
ENSMUSG00000032185	Carm1	coactivator associated arginine methyltransferase 1	1.17068	0.00145381	Nucleus	transcription regulator	2
ENSMUSG00000048251	Bcl11b	B cell CLL/lymphoma 11B	2.69212	0.00161717	Nucleus	transcription regulator	3
ENSMUSG00000000776	Polr3d	RNA polymerase III subunit D	1.20467	0.00190979	Nucleus	transcription regulator	1
ENSMUSG00000032702	Kank1	KN motif and ankyrin repeat domains 1	6.22853	0.0025521	Nucleus	transcription regulator	12
ENSMUSG00000058239	Usf2	upstream transcription factor 2, c-fos interacting	-1.16774	0.00360994	Nucleus	transcription regulator	1
ENSMUSG00000027985	Lef1	lymphoid enhancer binding factor 1	1.58785	0.00418146	Nucleus	transcription regulator	9
ENSMUSG00000000567	Sox9	SRY-box 9	6.08999	0.00423679	Nucleus	transcription regulator	13
ENSMUSG00000048047	Zbtb33	zinc finger and BTB domain containing 33	-2.01784	0.00426106	Nucleus	transcription regulator	2
ENSMUSG00000022508	Bcl6	B cell CLL/lymphoma 6	-1.15668	0.00465764	Nucleus	transcription regulator	6
ENSMUSG00000042745	Id1	inhibitor of DNA binding 1, HLH protein	-1.11522	0.00510407	Nucleus	transcription regulator	10
ENSMUSG00000020185	E2f7	E2F transcription factor 7	4.94446	0.00526949	Nucleus	transcription regulator	1
ENSMUSG00000002068	Ccne1	cyclin E1	2.30837	0.00700211	Nucleus	transcription regulator	2
ENSMUSG00000000861	Bcl11a	B cell CLL/lymphoma 11A	-1.07775	0.00717206	Nucleus	transcription regulator	17
ENSMUSG00000020275	Rel	REL proto-oncogene, NF-kB subunit	1.21501	0.00743539	Nucleus	transcription regulator	3
ENSMUSG00000035873	Pawr	pro-apoptotic WT1 regulator	5.89229	0.00887644	Nucleus	transcription regulator	4
ENSMUSG00000030699	Tbx6	T-box 6	-3.8589	0.00919694	Nucleus	transcription regulator	2
ENSMUSG00000001517	Foxm1	forkhead box M1	2.34892	0.00935674	Nucleus	transcription regulator	2
ENSMUSG00000031161	Hdac6	histone deacetylase 6	1.05051	0.0103106	Nucleus	transcription regulator	10
ENSMUSG00000042821	Snai1	snail family transcriptional repressor 1	5.96746	0.0106348	Nucleus	transcription regulator	9
ENSMUSG00000024238	Zeb1	zinc finger E-box binding homeobox 1	1.15913	0.0174423	Nucleus	transcription regulator	9
ENSMUSG00000055866	Per2	period circadian regulator 2	2.82524	0.0180667	Nucleus	transcription regulator	4
ENSMUSG00000052374	Actn2	actinin alpha 2	5.72366	0.0185099	Nucleus	transcription regulator	14
ENSMUSG00000073802	Cdkn2b	cyclin dependent kinase inhibitor 2B	4.01224	0.0228646	Nucleus	transcription regulator	7
ENSMUSG00000042607	Asb4	ankyrin repeat and SOCS box containing 4	5.92136	0.0316819	Nucleus	transcription regulator	3
ENSMUSG00000020656	Grhl1	grainyhead like transcription factor 1	2.16721	0.0350784	Nucleus	transcription regulator	2
ENSMUSG00000000782	Tcf7	transcription factor 7, T cell specific	1.70349	0.0356328	Nucleus	transcription regulator	3
ENSMUSG00000040183	Ankrd6	ankyrin repeat domain 6	4.80199	0.0407108	Nucleus	transcription regulator	8
ENSMUSG00000046876	Atxn1	ataxin 1	1.32442	0.0407373	Nucleus	transcription regulator	1
ENSMUSG00000053110	Yap1	Yes associated protein 1	-5.43028	0.0489043	Nucleus	transcription regulator	7

## Sheet: kinase
ID	Genes	Entrez Gene Name	log2FoldChange	padj	Location	Type	number_GO
ENSMUSG00000034974	Dapk3	death associated protein kinase 3	4.06687	7.82876e-48	Cytoplasm	kinase	12
ENSMUSG00000024789	Jak2	Janus kinase 2	2.29165	1.98527e-15	Cytoplasm	kinase	27
ENSMUSG00000019970	Sgk1	serum/glucocorticoid regulated kinase 1	1.94091	1.09107e-14	Cytoplasm	kinase	8
ENSMUSG00000024014	Pim1	Pim-1 proto-oncogene, serine/threonine kinase	2.90508	4.77431e-14	Cytoplasm	kinase	1
ENSMUSG00000028284	Map3k7	mitogen-activated protein kinase kinase kinase 7	1.65722	1.41104e-11	Cytoplasm	kinase	7
ENSMUSG00000005469	Prkaca	protein kinase cAMP-activated catalytic subunit alpha	2.36741	8.20493e-11	Cytoplasm	kinase	10
ENSMUSG00000003345	Csnk1g2	casein kinase 1 gamma 2	2.33524	2.14018e-10	Cytoplasm	kinase	5
ENSMUSG00000036526	Card11	caspase recruitment domain family member 11	2.96894	4.28879e-10	Cytoplasm	kinase	2
ENSMUSG00000007411	Mark3	microtubule affinity regulating kinase 3	2.29468	6.06816e-10	Cytoplasm	kinase	1
ENSMUSG00000031714	Gab1	GRB2 associated binding protein 1	1.76726	3.4165e-08	Cytoplasm	kinase	7
ENSMUSG00000061878	Sphk1	sphingosine kinase 1	7.07429	4.11824e-08	Cytoplasm	kinase	8
ENSMUSG00000022433	Csnk1e	casein kinase 1 epsilon	1.44493	1.25027e-07	Cytoplasm	kinase	8
ENSMUSG00000020395	Itk	IL2 inducible T cell kinase	1.96184	1.66647e-07	Cytoplasm	kinase	2
ENSMUSG00000032501	Trib1	tribbles pseudokinase 1	1.57163	1.7065e-07	Cytoplasm	kinase	5
ENSMUSG00000020580	Rock2	Rho associated coiled-coil containing protein kinase 2	1.05269	5.04734e-06	Cytoplasm	kinase	28
ENSMUSG00000057058	Skap1	src kinase associated phosphoprotein 1	1.90482	5.59526e-06	Cytoplasm	kinase	1
ENSMUSG00000000409	Lck	LCK proto-oncogene, Src family tyrosine kinase	1.65908	7.79309e-06	Cytoplasm	kinase	3
ENSMUSG00000059923	Grb2	growth factor receptor bound protein 2	1.0899	1.08913e-05	Cytoplasm	kinase	5
ENSMUSG00000002997	Prkar2b	protein kinase cAMP-dependent type II regulatory subunit beta	-1.41491	1.13738e-05	Cytoplasm	kinase	3
ENSMUSG00000004798	Ulk2	unc-51 like autophagy activating kinase 2	1.3007	1.52181e-05	Cytoplasm	kinase	6
ENSMUSG00000020700	Map3k3	mitogen-activated protein kinase kinase kinase 3	1.2327	2.38525e-05	Cytoplasm	kinase	12
ENSMUSG00000021754	Map3k1	mitogen-activated protein kinase kinase kinase 1	1.02605	4.23965e-05	Cytoplasm	kinase	3
ENSMUSG00000035064	Eef2k	eukaryotic elongation factor 2 kinase	1.62248	6.56649e-05	Cytoplasm	kinase	21
ENSMUSG00000037493	Cib2	calcium and integrin binding family member 2	-1.13512	6.98179e-05	Cytoplasm	kinase	5
ENSMUSG00000073563	Csnk1g3	casein kinase 1 gamma 3	1.57355	0.000123169	Cytoplasm	kinase	5
ENSMUSG00000021559	Dapk1	death associated protein kinase 1	1.3378	0.000132124	Cytoplasm	kinase	1
ENSMUSG00000026778	Prkcq	protein kinase C theta	1.26404	0.000139885	Cytoplasm	kinase	7
ENSMUSG00000030272	Camk1	calcium/calmodulin dependent protein kinase I	1.00645	0.000182202	Cytoplasm	kinase	14
ENSMUSG00000052889	Prkcb	protein kinase C beta	1.2711	0.00023338	Cytoplasm	kinase	6
ENSMUSG00000025855	Prkar1b	protein kinase cAMP-dependent type I regulatory subunit beta	2.03466	0.000491168	Cytoplasm	kinase	2
ENSMUSG00000000127	Fer	FER tyrosine kinase	1.85106	0.000584896	Cytoplasm	kinase	6
ENSMUSG00000037251	Pomk	protein-O-mannose kinase	-1.06062	0.000850372	Cytoplasm	kinase	2
ENSMUSG00000029516	Cit	citron rho-interacting serine/threonine kinase	2.89491	0.000909105	Cytoplasm	kinase	5
ENSMUSG00000022263	Trio	trio Rho guanine nucleotide exchange factor	-1.39673	0.000913975	Cytoplasm	kinase	3
ENSMUSG00000022836	Mylk	myosin light chain kinase	-2.59773	0.00225127	Cytoplasm	kinase	2
ENSMUSG00000040276	Pacsin1	protein kinase C and casein kinase substrate in neurons 1	3.5233	0.00554374	Cytoplasm	kinase	10
ENSMUSG00000022607	Ptk2	protein tyrosine kinase 2	1.63646	0.0129299	Cytoplasm	kinase	42
ENSMUSG00000046707	Csnk2a2	casein kinase 2 alpha 2	-1.09465	0.0145259	Cytoplasm	kinase	2
ENSMUSG00000001729	Akt1	AKT serine/threonine kinase 1	1.97359	0.029384	Cytoplasm	kinase	25
ENSMUSG00000045038	Prkce	protein kinase C epsilon	-1.35637	0.0293865	Cytoplasm	kinase	1
ENSMUSG00000014932	Yes1	YES proto-oncogene 1, Src family tyrosine kinase	5.74703	0.0437206	Cytoplasm	kinase	4
ENSMUSG00000005102	Eif2ak4	eukaryotic translation initiation factor 2 alpha kinase 4	1.02247	0.0468867	Cytoplasm	kinase	3

## Sheet: transmembrane receptor
ID	Genes	Entrez Gene Name	log2FoldChange	padj	Location	Type	number_GO
ENSMUSG00000051439	Cd14	CD14 molecule	3.95571	3.17082e-44	Plasma Membrane	transmembrane receptor	4
ENSMUSG00000042265	Trem1	triggering receptor expressed on myeloid cells 1	4.03163	2.67652e-27	Plasma Membrane	transmembrane receptor	1
ENSMUSG00000015396	Cd83	CD83 molecule	6.45272	9.0632e-26	Plasma Membrane	transmembrane receptor	3
ENSMUSG00000030084	Plxna1	plexin A1	3.75311	8.15593e-20	Plasma Membrane	transmembrane receptor	11
ENSMUSG00000030789	Itgax	integrin subunit alpha X	2.69802	7.51065e-18	Plasma Membrane	transmembrane receptor	2
ENSMUSG00000023349	Clec4n	C-type lectin domain containing 6A	2.38737	6.85451e-17	Plasma Membrane	transmembrane receptor	4
ENSMUSG00000006389	Mpl	MPL proto-oncogene, thrombopoietin receptor	-10.8626	1.80182e-16	Plasma Membrane	transmembrane receptor	1
ENSMUSG00000027962	Vcam1	vascular cell adhesion molecule 1	9.8444	2.3269e-13	Plasma Membrane	transmembrane receptor	1
ENSMUSG00000027111	Itga6	integrin subunit alpha 6	2.16135	3.65818e-13	Plasma Membrane	transmembrane receptor	13
ENSMUSG00000050675	Gp1ba	glycoprotein Ib platelet subunit alpha	-4.79078	4.6971e-13	Plasma Membrane	transmembrane receptor	1
ENSMUSG00000078810	Gp6	glycoprotein VI platelet	-5.69789	1.21301e-12	Plasma Membrane	transmembrane receptor	1
ENSMUSG00000027995	Tlr2	toll like receptor 2	1.55033	3.23056e-12	Plasma Membrane	transmembrane receptor	15
ENSMUSG00000020695	Mrc2	mannose receptor C type 2	8.83317	7.81536e-10	Plasma Membrane	transmembrane receptor	3
ENSMUSG00000020689	Itgb3	integrin subunit beta 3	-1.88608	1.04752e-09	Plasma Membrane	transmembrane receptor	40
ENSMUSG00000002944	Cd36	CD36 molecule	1.82263	5.26777e-09	Plasma Membrane	transmembrane receptor	13
ENSMUSG00000026073	Il1r2	interleukin 1 receptor type 2	4.32355	6.04625e-09	Plasma Membrane	transmembrane receptor	4
ENSMUSG00000023830	Igf2r	insulin like growth factor 2 receptor	2.12972	1.01644e-08	Plasma Membrane	transmembrane receptor	2
ENSMUSG00000023905	Tnfrsf12a	TNF receptor superfamily member 12A	2.04381	2.6534e-08	Plasma Membrane	transmembrane receptor	11
ENSMUSG00000024610	Cd74	CD74 molecule	1.65353	3.50304e-08	Plasma Membrane	transmembrane receptor	2
ENSMUSG00000030748	Il4ra	interleukin 4 receptor	1.20855	5.8965e-08	Plasma Membrane	transmembrane receptor	4
ENSMUSG00000031639	Tlr3	toll like receptor 3	2.62938	8.42576e-08	Plasma Membrane	transmembrane receptor	5
ENSMUSG00000074785	Plxnc1	plexin C1	1.56581	2.27119e-07	Plasma Membrane	transmembrane receptor	7
ENSMUSG00000022305	Lrp12	LDL receptor related protein 12	3.02252	3.20465e-07	Plasma Membrane	transmembrane receptor	1
ENSMUSG00000027009	Itga4	integrin subunit alpha 4	-1.12598	5.03959e-07	Plasma Membrane	transmembrane receptor	15
ENSMUSG00000030149	Klrk1	killer cell lectin-like receptor subfamily K, member 1	1.68995	6.23605e-07	Plasma Membrane	transmembrane receptor	4
ENSMUSG00000070942	Il1rl2	interleukin 1 receptor like 2	2.49981	1.58882e-06	Plasma Membrane	transmembrane receptor	1
ENSMUSG00000007655	Cav1	caveolin 1	7.141	2.09927e-06	Plasma Membrane	transmembrane receptor	34
ENSMUSG00000029075	Tnfrsf4	TNF receptor superfamily member 4	3.41983	2.55706e-06	Plasma Membrane	transmembrane receptor	2
ENSMUSG00000062300	Nectin2	nectin cell adhesion molecule 2	3.00798	4.87558e-06	Plasma Membrane	transmembrane receptor	3
ENSMUSG00000026069	Il1rl1	interleukin 1 receptor like 1	3.85677	6.81252e-06	Plasma Membrane	transmembrane receptor	6
ENSMUSG00000015314	Slamf6	SLAM family member 6	1.74946	6.97327e-06	Plasma Membrane	transmembrane receptor	1
ENSMUSG00000026321	Tnfrsf11a	TNF receptor superfamily member 11a	1.79266	1.54329e-05	Plasma Membrane	transmembrane receptor	4
ENSMUSG00000056962	Jmjd6	arginine demethylase and lysine hydroxylase	1.21361	2.04618e-05	Plasma Membrane	transmembrane receptor	2
ENSMUSG00000026770	Il2ra	interleukin 2 receptor subunit alpha	5.683	2.08959e-05	Plasma Membrane	transmembrane receptor	3
ENSMUSG00000015316	Slamf1	signaling lymphocytic activation molecule family member 1	-2.17656	2.83717e-05	Plasma Membrane	transmembrane receptor	4
ENSMUSG00000034664	Itga2b	integrin subunit alpha 2b	-6.32799	4.13413e-05	Plasma Membrane	transmembrane receptor	6
ENSMUSG00000002033	Cd3g	CD3g molecule	1.90398	6.56649e-05	Plasma Membrane	transmembrane receptor	1
ENSMUSG00000024670	Cd6	CD6 molecule	2.16482	7.56459e-05	Plasma Membrane	transmembrane receptor	1
ENSMUSG00000026070	Il18r1	interleukin 18 receptor 1	2.53006	7.89244e-05	Plasma Membrane	transmembrane receptor	2
ENSMUSG00000046223	Plaur	plasminogen activator, urokinase receptor	1.16719	0.00011013	Plasma Membrane	transmembrane receptor	2
ENSMUSG00000031616	Ednra	endothelin receptor type A	7.06724	0.0001193	Plasma Membrane	transmembrane receptor	6
ENSMUSG00000005672	Kit	KIT proto-oncogene receptor tyrosine kinase	5.57408	0.000189246	Plasma Membrane	transmembrane receptor	10
ENSMUSG00000079164	Tlr5	toll like receptor 5	1.27684	0.000326339	Plasma Membrane	transmembrane receptor	8
ENSMUSG00000034220	Gpc1	glypican 1	1.52999	0.000374616	Plasma Membrane	transmembrane receptor	8
ENSMUSG00000028602	Tnfrsf8	TNF receptor superfamily member 8	-1.75582	0.000473889	Plasma Membrane	transmembrane receptor	1
ENSMUSG00000022900	Ildr1	immunoglobulin like domain containing receptor 1	3.1161	0.0007813	Plasma Membrane	transmembrane receptor	2
ENSMUSG00000000791	Il12rb1	interleukin 12 receptor subunit beta 1	2.75206	0.00222714	Plasma Membrane	transmembrane receptor	4
ENSMUSG00000068758	Il3ra	interleukin 3 receptor subunit alpha	-1.3628	0.00858319	Plasma Membrane	transmembrane receptor	2
ENSMUSG00000005465	Il27ra	interleukin 27 receptor subunit alpha	1.09129	0.0105959	Plasma Membrane	transmembrane receptor	2
ENSMUSG00000079685	Ulbp1	UL16 binding protein 1	2.85022	0.0116571	Plasma Membrane	transmembrane receptor	4
ENSMUSG00000028128	F3	coagulation factor III, tissue factor	6.25518	0.0183234	Plasma Membrane	transmembrane receptor	14
ENSMUSG00000028965	Tnfrsf9	TNF receptor superfamily member 9	1.47283	0.021115	Plasma Membrane	transmembrane receptor	3
ENSMUSG00000042333	Tnfrsf14	TNF receptor superfamily member 14	-1.04527	0.0277668	Plasma Membrane	transmembrane receptor	4
ENSMUSG00000026012	Cd28	CD28 molecule	1.72946	0.0279468	Plasma Membrane	transmembrane receptor	4
ENSMUSG00000049929	Lpar4	lysophosphatidic acid receptor 4	4.91949	0.0302098	Plasma Membrane	transmembrane receptor	3
ENSMUSG00000059921	Unc5c	unc-5 netrin receptor C	3.24483	0.0375854	Plasma Membrane	transmembrane receptor	2
ENSMUSG00000028613	Lrp8	LDL receptor related protein 8	3.93449	0.0389973	Plasma Membrane	transmembrane receptor	20
ENSMUSG00000030336	Cd27	CD27 molecule	1.30384	0.0431865	Plasma Membrane	transmembrane receptor	1
ENSMUSG00000022865	Cxadr	CXADR, Ig-like cell adhesion molecule	4.72928	0.0442146	Plasma Membrane	transmembrane receptor	8
ENSMUSG00000036766	Dner	delta/notch like EGF repeat containing	3.23139	0.045645	Plasma Membrane	transmembrane receptor	1

## Sheet: nuclear receptor
ID	Genes	Symbol	Entrez Gene Name	log2FoldChange	padj	Location	Type	number_GO
ENSMUSG00000026826	Nr4a2	NR4A2	nuclear receptor subfamily 4 group A member 2	5.74232	2.77261e-09	Nucleus	ligand-dependent nuclear receptor	10
ENSMUSG00000037992	Rara	RARA	retinoic acid receptor alpha	-1.39052	2.07824e-06	Nucleus	ligand-dependent nuclear receptor	7
ENSMUSG00000000440	Pparg	PPARG	peroxisome proliferator activated receptor gamma	1.35405	3.73703e-06	Nucleus	ligand-dependent nuclear receptor	15
ENSMUSG00000002108	Nr1h3	NR1H3	nuclear receptor subfamily 1 group H member 3	1.58405	4.89389e-06	Nucleus	ligand-dependent nuclear receptor	1
ENSMUSG00000031618	Nr3c2	NR3C2	nuclear receptor subfamily 3 group C member 2	4.94222	0.00158544	Nucleus	ligand-dependent nuclear receptor	5
ENSMUSG00000028341	Nr4a3	NR4A3	nuclear receptor subfamily 4 group A member 3	4.4874	0.00220009	Nucleus	ligand-dependent nuclear receptor	19
ENSMUSG00000001288	Rarg	RARG	retinoic acid receptor gamma	-1.67831	0.00258135	Nucleus	ligand-dependent nuclear receptor	2
ENSMUSG00000023034	Nr4a1	NR4A1	nuclear receptor subfamily 4 group A member 1	2.56671	0.00383433	Nucleus	ligand-dependent nuclear receptor	7
ENSMUSG00000058756	Thra	THRA	thyroid hormone receptor alpha	-1.80769	0.00716108	Nucleus	ligand-dependent nuclear receptor	6
ENSMUSG00000030551	Nr2f2	NR2F2	nuclear receptor subfamily 2 group F member 2	5.36219	0.0427295	Nucleus	ligand-dependent nuclear receptor	9

## Sheet: growth factor
ID	Genes	Entrez Gene Name	log2FoldChange	padj	Location	Type	number_GO
ENSMUSG00000020053	Igf1	insulin like growth factor 1	5.25366	2.44881e-26	Extracellular Space	growth factor	33
ENSMUSG00000038508	Gdf15	growth differentiation factor 15	7.2366	1.36047e-24	Extracellular Space	growth factor	2
ENSMUSG00000031451	Gas6	growth arrest specific 6	12.8167	3.63815e-23	Extracellular Space	growth factor	7
ENSMUSG00000000489	Pdgfb	platelet derived growth factor subunit B	2.73489	5.80018e-17	Extracellular Space	growth factor	34
ENSMUSG00000027276	Jag1	jagged 1	3.83391	1.28903e-14	Extracellular Space	growth factor	8
ENSMUSG00000029999	Tgfa	transforming growth factor alpha	9.41912	5.42032e-11	Extracellular Space	growth factor	3
ENSMUSG00000024962	Vegfb	vascular endothelial growth factor B	3.69877	2.51118e-10	Extracellular Space	growth factor	16
ENSMUSG00000025856	Pdgfa	platelet derived growth factor subunit A	2.8388	1.76592e-09	Extracellular Space	growth factor	6
ENSMUSG00000029378	Areg	amphiregulin	5.10204	5.79955e-08	Extracellular Space	growth factor	4
ENSMUSG00000024486	Hbegf	heparin binding EGF like growth factor	3.74515	1.29812e-05	Extracellular Space	growth factor	6
ENSMUSG00000031465	Angpt2	angiopoietin 2	4.93447	0.000385837	Extracellular Space	growth factor	12
ENSMUSG00000029838	Ptn	pleiotrophin	6.92736	0.000432495	Extracellular Space	growth factor	14
ENSMUSG00000036169	Sostdc1	sclerostin domain containing 1	6.33376	0.00204621	Extracellular Space	growth factor	7
ENSMUSG00000002799	Jag2	jagged 2	5.06259	0.00220266	Extracellular Space	growth factor	3
ENSMUSG00000019966	Kitl	KIT ligand	6.03708	0.00583752	Extracellular Space	growth factor	3
ENSMUSG00000041324	Inhba	inhibin subunit beta A	3.15621	0.00629231	Extracellular Space	growth factor	3
ENSMUSG00000021253	Tgfb3	transforming growth factor beta 3	3.23366	0.00993074	Extracellular Space	growth factor	29
ENSMUSG00000060275	Nrg2	neuregulin 2	3.68859	0.012371	Extracellular Space	growth factor	6
ENSMUSG00000019997	Ctgf	connective tissue growth factor	6.12095	0.0200512	Extracellular Space	growth factor	11
ENSMUSG00000031137	Fgf13	fibroblast growth factor 13	2.36162	0.029458	Extracellular Space	growth factor	10
ENSMUSG00000036585	Fgf1	fibroblast growth factor 1	4.9183	0.0305538	Extracellular Space	growth factor	16
ENSMUSG00000039239	Tgfb2	transforming growth factor beta 2	4.74839	0.0400455	Extracellular Space	growth factor	24

## Sheet: cytokine
ID	Genes	Entrez Gene Name	log2FoldChange	padj	Location	Type	number_GO
ENSMUSG00000029304	Spp1	secreted phosphoprotein 1	10.8339	1.92009e-183	Extracellular Space	cytokine	5
ENSMUSG00000058755	Osm	oncostatin M	6.05954	4.88983e-147	Extracellular Space	cytokine	6
ENSMUSG00000018920	Cxcl16	C-X-C motif chemokine ligand 16	5.23773	1.49634e-124	Extracellular Space	cytokine	2
ENSMUSG00000035373	Ccl7	chemokine (C-C motif) ligand 7	10.6543	1.92468e-47	Extracellular Space	cytokine	2
ENSMUSG00000027398	Il1b	interleukin 1 beta	3.91851	9.6223e-45	Extracellular Space	cytokine	25
ENSMUSG00000026981	Il1rn	interleukin 1 receptor antagonist	2.99733	1.54402e-39	Extracellular Space	cytokine	7
ENSMUSG00000035352	Ccl12	C-C motif chemokine ligand 2	8.94524	3.23962e-32	Extracellular Space	cytokine	11
ENSMUSG00000031779	Ccl22	C-C motif chemokine ligand 22	11.9424	1.42659e-20	Extracellular Space	cytokine	2
ENSMUSG00000000982	Ccl3	C-C motif chemokine ligand 3 like 3	3.10771	1.76637e-20	Extracellular Space	cytokine	9
ENSMUSG00000027399	Il1a	interleukin 1 alpha	11.5084	7.56853e-19	Extracellular Space	cytokine	14
ENSMUSG00000001131	Timp1	TIMP metallopeptidase inhibitor 1	10.9836	1.98939e-17	Extracellular Space	cytokine	6
ENSMUSG00000019122	Ccl9	chemokine (C-C motif) ligand 9	-1.33545	3.18159e-12	Extracellular Space	cytokine	2
ENSMUSG00000031778	Cx3cl1	C-X3-C motif chemokine ligand 1	9.20166	2.82908e-11	Extracellular Space	cytokine	24
ENSMUSG00000035385	Ccl2	chemokine (C-C motif) ligand 2	4.48158	3.48405e-11	Extracellular Space	cytokine	16
ENSMUSG00000058427	Cxcl2	C-X-C motif chemokine ligand 3	2.78873	7.86493e-10	Extracellular Space	cytokine	2
ENSMUSG00000029417	Cxcl9	chemokine (C-X-C motif) ligand 9	2.46607	9.35919e-10	Extracellular Space	cytokine	2
ENSMUSG00000021508	Cxcl14	C-X-C motif chemokine ligand 14	8.35517	1.09267e-08	Extracellular Space	cytokine	2
ENSMUSG00000004814	Ccl24	C-C motif chemokine ligand 24	3.6324	1.61796e-07	Extracellular Space	cytokine	9
ENSMUSG00000034394	Lif	LIF, interleukin 6 family cytokine	4.01227	1.76546e-07	Extracellular Space	cytokine	10
ENSMUSG00000029379	Cxcl3	chemokine (C-X-C motif) ligand 3	6.05315	4.94533e-07	Extracellular Space	cytokine	2
ENSMUSG00000034855	Cxcl10	C-X-C motif chemokine ligand 10	1.43533	2.52362e-06	Extracellular Space	cytokine	5
ENSMUSG00000033721	Vav3	vav guanine nucleotide exchange factor 3	1.22221	3.86806e-06	Extracellular Space	cytokine	6
ENSMUSG00000004296	Il12b	interleukin 12B	7.54726	4.97495e-06	Extracellular Space	cytokine	6
ENSMUSG00000031780	Ccl17	C-C motif chemokine ligand 17	5.12723	7.07436e-06	Extracellular Space	cytokine	2
ENSMUSG00000040663	Clcf1	cardiotrophin like cytokine factor 1	2.57766	9.37543e-06	Extracellular Space	cytokine	7
ENSMUSG00000018930	Ccl4	C-C motif chemokine ligand 4	3.53626	1.69541e-05	Extracellular Space	cytokine	4
ENSMUSG00000016529	Il10	interleukin 10	6.63899	3.16761e-05	Extracellular Space	cytokine	30
ENSMUSG00000029372	Ppbp	pro-platelet basic protein	-6.44813	0.000177758	Other	cytokine	2
ENSMUSG00000060183	Cxcl11	chemokine (C-X-C motif) ligand 11	6.79872	0.000241032	Extracellular Space	cytokine	2
ENSMUSG00000041012	Cmtm8	CKLF like MARVEL transmembrane domain containing 8	2.89404	0.000323959	Extracellular Space	cytokine	2
ENSMUSG00000055170	Ifng	interferon gamma	2.60639	0.000331575	Extracellular Space	cytokine	15
ENSMUSG00000025746	Il6	interleukin 6	2.8434	0.00034645	Extracellular Space	cytokine	23
ENSMUSG00000000817	Fasl	Fas ligand	1.57106	0.000598113	Extracellular Space	cytokine	12
ENSMUSG00000014599	Csf1	colony stimulating factor 1	2.10554	0.00084162	Extracellular Space	cytokine	3
ENSMUSG00000060034	Ctf2	cardiotrophin 2	-2.2784	0.000918512	Extracellular Space	cytokine	2
ENSMUSG00000001741	Il16	interleukin 16	-1.01793	0.0013675	Extracellular Space	cytokine	3
ENSMUSG00000035042	Ccl5	C-C motif chemokine ligand 5	1.31501	0.00146934	Extracellular Space	cytokine	17
ENSMUSG00000031497	Tnfsf13b	TNF superfamily member 13b	-1.03942	0.00527558	Extracellular Space	cytokine	2
ENSMUSG00000025383	Il23a	interleukin 23 subunit alpha	-5.32391	0.0136019	Extracellular Space	cytokine	4
ENSMUSG00000030772	Dkk3	dickkopf WNT signaling pathway inhibitor 3	6.32381	0.0138938	Extracellular Space	cytokine	5
ENSMUSG00000026700	Tnfsf4	TNF superfamily member 4	4.66367	0.0219108	Extracellular Space	cytokine	8
ENSMUSG00000028362	Tnfsf8	TNF superfamily member 8	2.59257	0.024071	Plasma Membrane	cytokine	2
ENSMUSG00000023235	Ccl25	C-C motif chemokine ligand 25	-1.01484	0.030832	Extracellular Space	cytokine	2
ENSMUSG00000024401	Tnf	tumor necrosis factor	1.01858	0.0444062	Extracellular Space	cytokine	40

## Sheet: enzyme
ID	Genes	Entrez Gene Name	log2FoldChange	padj	Location	Type	number_GO
ENSMUSG00000025854	Fam20c	FAM20C, golgi associated secretory pathway kinase	1.85811	8.85078e-11	Extracellular Space	enzyme	3
ENSMUSG00000018476	Kdm6b	lysine demethylase 6B	1.97235	5.74895e-09	Extracellular Space	enzyme	3
ENSMUSG00000026193	Fn1	fibronectin 1	-1.59862	2.90138e-07	Extracellular Space	enzyme	20
ENSMUSG00000039109	F13a1	coagulation factor XIII A chain	-1.07101	4.13413e-05	Extracellular Space	enzyme	2
ENSMUSG00000058488	Kl	klotho	7.26406	6.90323e-05	Extracellular Space	enzyme	3
ENSMUSG00000064246	Chil1	chitinase 3 like 1	4.49727	0.000548455	Extracellular Space	enzyme	5
ENSMUSG00000072941	Sod3	superoxide dismutase 3	6.70059	0.000721752	Extracellular Space	enzyme	2
ENSMUSG00000052911	Lamb2	laminin subunit beta 2	2.6191	0.00110495	Extracellular Space	enzyme	15
ENSMUSG00000016637	Ift27	intraflagellar transport 27	-1.00801	0.00142597	Extracellular Space	enzyme	1
ENSMUSG00000000693	Loxl3	lysyl oxidase like 3	1.91002	0.00222899	Extracellular Space	enzyme	3
ENSMUSG00000019846	Lama4	laminin subunit alpha 4	6.37262	0.0365481	Extracellular Space	enzyme	3

## Sheet: peptidase
ID	Genes	Entrez Gene Name	log2FoldChange	padj	Location	Type	number_GO
ENSMUSG00000000957	Mmp14	matrix metallopeptidase 14	6.38418	4.28996e-73	Extracellular Space	peptidase	15
ENSMUSG00000029096	Htra3	HtrA serine peptidase 3	6.91971	8.61935e-24	Extracellular Space	peptidase	8
ENSMUSG00000005800	Mmp8	matrix metallopeptidase 8	-1.80392	1.48251e-20	Extracellular Space	peptidase	10
ENSMUSG00000031722	Hp	haptoglobin	-1.71432	1.26668e-17	Extracellular Space	peptidase	1
ENSMUSG00000022893	Adamts1	ADAM metallopeptidase with thrombospondin type 1 motif 1	9.058	1.60996e-10	Extracellular Space	peptidase	17
ENSMUSG00000024164	C3	complement C3	-1.65461	2.2561e-08	Extracellular Space	peptidase	9
ENSMUSG00000031740	Mmp2	matrix metallopeptidase 2	3.23076	9.78888e-06	Extracellular Space	peptidase	18
ENSMUSG00000022098	Bmp1	bone morphogenetic protein 1	7.22595	4.16512e-05	Extracellular Space	peptidase	3
ENSMUSG00000059901	Adamts14	ADAM metallopeptidase with thrombospondin type 1 motif 14	1.69656	0.000111244	Extracellular Space	peptidase	2
ENSMUSG00000025355	Mmp19	matrix metallopeptidase 19	1.18643	0.000347971	Extracellular Space	peptidase	3
ENSMUSG00000064023	Klk8	kallikrein related peptidase 8	1.9319	0.000383119	Extracellular Space	peptidase	10
ENSMUSG00000021822	Plau	plasminogen activator, urokinase	2.69418	0.00041628	Extracellular Space	peptidase	4
ENSMUSG00000020125	Elane	elastase, neutrophil expressed	4.56149	0.000996272	Extracellular Space	peptidase	7
ENSMUSG00000022225	Cma1	chymase 1	1.75746	0.00118837	Extracellular Space	peptidase	6
ENSMUSG00000029061	Mmp23	matrix metallopeptidase 23B	5.88704	0.00865013	Extracellular Space	peptidase	1
ENSMUSG00000006205	Htra1	HtrA serine peptidase 1	2.77825	0.0163007	Extracellular Space	peptidase	10
ENSMUSG00000018623	Mmp7	matrix metallopeptidase 7	5.53988	0.0265605	Extracellular Space	peptidase	3
ENSMUSG00000049723	Mmp12	matrix metallopeptidase 12	4.76181	0.0321165	Extracellular Space	peptidase	6
ENSMUSG00000000901	Mmp11	matrix metallopeptidase 11	5.81042	0.0394565	Extracellular Space	peptidase	5
